# Supplementary material for: On etching, selection and measurement of confined fission tracks in apatite
Source: Copernicus journal article supplement (doi:10.5194/gchron-2023-13), 2023-06-16
Supplement: Supplementary file 1 [file RJ MS ESM GC3.xlsx]

## Sheet: Length standards
	21-2										21-4										21-1												21-3 ALL														21-3 GAPS
	Count	637	637	637	629	553	553	83	56		Count	373	371	371	336	336	336	35	14		Count	320	320	320	308	281	5	281	7	38	28		Count	821	731	78	12	731	61	18	724	713	714	102	63		Count	78	78
	Mean	53.081	16.0501	16.3664	0.679245	0.534219	7.56121	1.03423	0.96167		Mean	54.3178	14.6397	15.3793	0.793374	0.625934	6.05242	1.05517	1.03687		Mean	53.4938	12.4869	13.8559	0.757705	0.62872	0.854358	5.96061	2.64754	1.36523	1.28548		Mean	53.2126	10.7014	8.9265	5.02398	12.6601	12.5533	11.8867	0.671762	0.515628	4.9263	0.997615	0.998671		Mean	73.9124	3.24388
	Error	0.891919	0.0323732	0.0246436	0.00936375	0.00754369	0.0990773	0.0242625	0.0243703		Error	1.09847	0.0427081	0.0297509	0.0122057	0.010243	0.15594	0.0323094	0.0659522		Error	1.22557	0.0527166	0.0296209	0.0152693	0.0135976	0.0982104	0.111379	0.630129	0.0480449	0.0494366		Error	0.77173	0.0467318	0.170355	0.274248	0.0199591	0.0396554	0.0917549	0.00754895	0.00604525	0.0716948	0.0248241	0.0230809		Error	1.31032	0.154616
	S.dev.	22.511	0.817064	0.621976	0.234842	0.177397	2.3299	0.221041	0.182371		S.dev.	21.215	0.822617	0.573042	0.223733	0.187758	2.85843	0.191145	0.24677		S.dev.	21.9237	0.943023	0.529875	0.267976	0.227938	0.219605	1.86705	1.66716	0.296169	0.261594		S.dev.	22.1124	1.26349	1.50454	0.950023	0.539634	0.309719	0.389283	0.203122	0.161421	1.91574	0.250711	0.183199		S.dev.	11.5724	1.36553
	Track	θ	l	lC	r0	r1	s1	d1	d2		Track	θ	l	lC	r0	r1	s1	d1	d2		Track	θ	l	lC	r0	r1	r2	s1	s2	d1	d2		Track	θ	l	lGAP	l<6.5	lC	lC-GAP	lC<6.5	r0	r1	s1	d1	d2		Track	θ	l1
	1	55.8	15.7716	16.23	0.993897	0.470793	9.8082				1	76.2	15.51	16.14	0.65388	0.523104	5.10026				1	33.9	12.6367	13.52	0.389821	0.341094		7.19545					119a	89.6			4.39407			12.17				1.15083	1.15083		1	62.2	2.91892
	2	70.9	16.2685	16.63	1.04621	0.863121	8.89276				2	66.6	14.2546	15.32	0.863121	0.627724	12.3976				2	55.2	11.987	13.64	0.69843	0.665945		2.59881					132	81.5			5.4612			12.24				0.810811			2	89.9	3.20401
	3	83.9	16.2424	16.59				1.33391	1.2816		3	71.1	14.8038	15.68	0.889276	0.7585	8.68352				3	23.4	12.7829	13.29	0.389821	0.292366		10.4277					136	85			4.53008			12.09				0.627724			16	87.4	1.71578
	4	68.3	15.5623	16.17	0.784656	0.444638	10.4098				4	44.9	15.6146	16	0.601569	0.418483	9.31125				4	57	11.6459	13.46	0.909583	0.893341		4.77531					137	56.7			6.51264			11.63	0.496949	0.340017	4.13252				19	80.1	3.1517
	5	82.5	14.0976	15.29				1.17698			5	41.9	15.3269	15.74	0.575414	0.470793	10.7759				5	82	11.9708	13.98						1.33189			248	45.5			5.20488			11.01	0.549259	0.470793	10.3836				20	73.2	2.34612
	6	37.1	17.4717	17.45	0.496949	0.470793	6.56495				6	51.7	14.5946	15.36	1.02005	0.889276	8.00349				6	25.4	12.9453	13.49	0.63346	0.600975		7.56903					279	85.6			2.90323			11.53				1.04621	0.941587		23	79.5	5.45597
	7	8.8	16.007	16.02	0.496949	0.366173	8.42197				7a	64	14.0453	15.1	0.732345	0.627724	4.81255				7	69.8	12.1169	13.97	1.23443	1.05577		8.80347					296	83.4			5.80645			12.37				1.30776	1.22929		52	88.2	2.05841
	8	47.6	16.7132	16.83	0.680035	0.549259	6.74804				7b	15.1	16.1639	16.24	0.549259	0.261552	7.11421				8	71.8	12.6205	14.31	0.958311	0.942068	0.812128	3.86573	3.52463				404	79.8			5.59721			12.21	0.313862	0.287707	3.63557				57	86.9	2.55536
	9	27.2	15.6408	15.8	0.340017	0.313862	6.8265				8	40.4	14.9346	15.41	0.915432	0.810811	6.90497				9	64.6	11.7596	13.67	1.02328	0.568489		9.20953					450	75.6			5.91107			12.15	0.627724	0.575414	3.00785				68	72.4	2.27027
	10	66.8	16.0854	16.49	0.810811	0.575414	7.8204				9	73.2	13.6269	14.94	0.732345	0.601569	6.93112				10	44.8	14.1635	14.93	0.82837	0.7634	0.779643	4.02815	2.84245				499	74.6			4.31561			11.77	0.549259	0.444638	1.7524				75	66.1	4.81255
	11	53.3	15.4054	15.93	1.02005	0.523104	10.3051				10	53.4	14.9085	15.59	0.810811	0.575414	7.14037				11	46.8	12.6205	13.87	0.860855	0.747158	0.584732	6.07472	2.79372				572	86.6			4.68178			12.18				0.889276	0.836966		76	79.3	3.28248
	12	4.5	15.51	15.51	0.287707	0.261552	2.72014				11	77.5	15.7716	16.33	0.993897	0.889276	5.85876				12	44.9	13.5463	14.49	0.584732	0.487277		9.07959					576	75.5			4.96949			11.95	0.915432	0.810811	1.93548				95	70.1	2.1238
	13	28.2	15.4054	15.64	0.470793	0.444638	5.62337				12	45.8	15.51	15.93	0.549259	0.444638	8.23888				13																										103	60.5	3.09416
	14	77.2	16.5301	16.77	0.65388	0.392328	8.13426				13	62.2	15.0392	15.74	0.967742	0.810811	10.7759				14	10.1	12.9453	13.06	0.519762	0.471034		11.6946					1	62.2		8.97908			12.09		1.04098	0.619878	8.0061				117	68.5	3.25632
	15	74.7	14.3069	15.38	0.70619	0.392328	10.279				14	75.6	14.3592	15.45	1.2816	0.915432	6.12031				15	37	12.6367	13.61	0.600975	0.438549		9.25826					2	89.9		10.8282								1.33391	1.17698		118	86.6	1.7184
	16	68.4	15.2746	15.98	0.575414	0.470793	3.94943				15	79.8	13.8361	15.1	0.993897	0.836966	10.0697				16	70.3	12.523	14.23	0.860855	0.649702		6.15593					16	87.4		9.65126								1.04621	0.915432		121	89	2.82738
	17	88.3	14.83	15.73				1.20314	1.15083		16	70	13.6007	14.91	1.17698	1.04621	7.68963				17	20.5	13.9361	14.22	0.665945	0.357336		8.80347					19	80.1		4.57716				11.89				0.993897	0.915432		126	72.7	3.1177
	18	36.5	16.687	16.79	0.627724	0.601569	7.48038				17	70.2	14.7515	15.67	1.30776	0.680035	12.0314				18	85.3	12.523	14.33	0.7634					0.7634	0.730915		20	73.2		6.28248				12.09	0.818657	0.32694	5.18396				132	81.5	3.08631
	19	55.6	16.7916	16.92	1.04621	0.65388	9.67742				18	81.3	14.5946	15.6				1.02005			19	87.4	11.8083	13.9	0.600975					1.2994	1.33189		23	79.5		7.89887			12.54		1.09852	0.496949	6.5388				139	72.9	5.38797
	19a	52	17.6024	17.49	1.04621	0.7585	8.44813				19	51.5	14.7515	15.49	0.863121	0.70619	5.72799				20	58.7	12.3281	13.94	1.49432	1.36437		5.01895					52	88.2		8.16042			12.86					0.65388			156	87.8	2.9163
	20	71.3	14.6731	15.62	0.889276	0.65388	5.04795				20	33.4	15.17	15.54	0.680035	0.470793	5.20488				21	81.9	10.2166	12.9	0.649702					1.39686	1.38062		57	86.9		10.5144								0.993897	0.941587		166	63.37	2.16042
	21	83.6	16.5039	16.77				1.62162	1.46469		21	69.9	14.5684	15.54	1.12467	0.863121	6.95728				22	84.5	11.8408	13.91	0.406064					0.909583	0.909583		68	72.4		9.62249			12.63		1.16914	0.452485	5.33043				193	79.3	4.15606
	22	53.8	15.9808	16.36	0.680035	0.496949	8.84045				22	58.5	15.4577	16.05	1.02005	0.863121	4.7864				23	26.1	12.7342	13.33	0.438549	0.292366		7.35788					75	66.1		8.84045			12.2		1.01744	0.269398	7.54839				198	83.5	6.37402
	23	53	16.6347	16.78	0.967742	0.810811	3.034				23	4.7	14.6731	14.71	0.392328	0.287707	7.95118				24	55.8	11.8571	13.57	0.812128	0.665945		3.39469					76	79.3		8.10026			12.55		0.661726	0.400174	4.8204				232	85.8	2.16827
	24	79.4	15.9024	16.4	1.2816	0.680035	8.10811				24	57.9	14.9869	15.7	0.889276	0.496949	11.4821				25	79	11.7109	13.8	1.49432	0.958311		5.63617					95	70.1		9.73496			12.48		0.983435	0.434176	5.97646				245	86.8	2.41151
	25	52.3	15.9808	16.35	0.863121	0.836966	11.8221				25	39.2	14.9608	15.47	0.523104	0.444638	2.72014				26	33.1	12.2469	13.19	0.584732	0.568489		4.22306					103	60.5		9.04969			12.02		0.732345	0.366173	6.77681				257	78.81	3.17786
	26	60	16.4778	16.73	1.04621	0.496949	11.6652				26	55.1	15.1439	15.74	0.915432	0.7585	9.54664				27	27.2	12.7666	13.4	0.7634	0.682187		5.42501					117	68.5		9.37402			12.32		1.03836	0.3034	6.58065				273	63.6	2.12903
	27	85.4	15.8762	16.41	0.340017						27	32	15.5885	15.86	0.836966	0.65388	8.42197				28	64.9	10.4277	12.83	1.21819	1.08825		5.32756					118	86.6		7.2973			12.73					1.33391	1.20314		284	61.9	4.19268
	28	45.4	15.2223	15.71	0.7585	0.70619	3.55711				28	79.7	14.8038	15.72	0.915432	0.575414	9.93897				29	22.5	13.2864	13.7	0.730915	0.552247		5.96102					121	89		8.86661			12.91					0.967742	0.915432		307	87.5	3.02616
	29	81.9	16.7132	16.9	0.836966			1.12467			29	88.9	15.6408	16.22				1.22929	1.20314														126	72.7		10.3051			12.87		0.959895	0.366173	6.48649				318	40.1	5.99477
	30	77	15.4316	16.08	1.04621	0.627724	10.6975				30	25.3	13.4438	13.87	0.732345	0.65388	5.72799				31	26	13.5463	14.02	0.600975	0.389821		8.20249					132	81.5		5.4612			12.07				5.63121	0.813426			334	55.3	4.99826
	32	76.3	16.3993	16.7	0.732345	0.418483	10.7236				31	65.9	14.7777	15.64	1.2816	0.967742	6.64342				32	38.3	12.994	13.91	1.08825	1.00704	0.909583	3.13481	4.51543				139	72.8		10.279			12.46		1.25545	0.332171	5.94246				336	76.4	4.73147
	33	35.2	15.46	15.81	0.65388	0.470793	8.00349				32	32.7	13.9407	14.48	0.523104	0.470793	2.35397				33	53	14.0661	15.01	0.958311	0.747158		6.70818					156	87.8		8.64167			12.86					0.915432	0.784656		339	80.9	2.4769
	34	39.4	16.4255	16.57	0.575414	0.523104	5.59721				33	36.5	13.1561	14.02	0.496949	0.366173	4.47254				34	72	12.4093	14.18	1.39686	1.21819		6.07472					166	63.4		9.47341			12.2		0.946818	0.57803	4.90671				367	74.6	2.3252
	35	52.5	15.7716	16.21	0.627724	0.366173	10.8806				34	63.9	14.9085	15.69	1.02005	0.915432	2.24935				35	78.7	11.6946	13.79	1.28316	1.12074		5.31132					193	79.3		8.89015			12.61		0.724499	0.164778	6.34786				381	88.2	3.41587
	36	60	15.0654	15.79	0.70619	0.627724	10.959				35	71.3	14.4377	15.43	0.65388	0.601569	2.0401				36	30.9	12.7179	13.48	0.7634	0.552247		8.00758					198	83.5		9.36356			12.76					0.899738			387	81.8	0.674804
	37	65.3	17.2101	17.2	0.915432	0.680035	8.5789				36	28	14.2284	14.62	0.732345	0.523104	10.2005				37	30.3	14.2447	14.7	0.536004	0.438549		3.39469					232	85.8		5.64429			12.41					1.27114	1.06713		395	70.9	1.54316
	38	16.2	17.3147	17.3	0.444638	0.392328	10.6975				37	62.8	14.333	15.29	0.784656	0.70619	5.96338				38	25.4	13.9361	14.33	0.747158	0.665945		7.35788					245	86.8		6.5048			12.62					1.12467	1.02005		443	58.66	1.49346
	39	62.3	17.027	17.07	0.784656	0.418483	12.7637				38a	81.2	14.9869	15.85				0.863121			39	74.6	12.653	14.35	1.16946	1.08825		5.1164					257	79.2		8.22581			12.55		0.912816	0.316478	3.70096				448	84.8	1.83086
	40	37	15.85	16.15	0.287707	0.235397	3.63557				38b	69.8	13.5484	14.84	0.889276	0.70619	6.51264				40	69.8	12.8154	14.41	1.42934	0.925826		8.91716					273	63.6		9.40802			12.17		0.829119	0.47864	6.25371				458	86.7	3.09939
	41	52.4	14.5423	15.3	0.732345	0.680035	5.3095				39a	78.4	15.2485	15.96	0.784656	0.523104	7.97733				41	33.2	12.1007	13.08	0.552247	0.454792		5.87981					284	61.9		8.60506			12.04		0.873583	0.575414	5.48736				463	62.4	6.36356
	42	86.4	15.7193	16.28	0.366173			1.02005	0.810811		39b	74.4	14.2807	15.38	1.09852	0.836966	10.279				42	69.8	11.5485	13.61	0.925826	0.877098		5.96102					307	87.5		9.90759			13.06					0.836966	0.70619		500	56.6	2.77245
	42a	86.4	15.7193	16.28	0.366173			1.09852	1.02005		40a	39.3	15.1962	15.63	1.09852	0.70619	9.99128				43	54.9	12.8316	14.19	1.28316	1.15322		5.50623					318	40.1		11.7437					0.640802	0.470793	9.37663				517b	89.3	1.91456
	43	43.1	15.6408	15.98	0.784656	0.444638	9.20663				40b	21.4	14.6731	14.92	0.575414	0.523104	9.62511				44	47.8	12.3606	13.71	1.25068	0.958311		8.29995					334	55.3		9.3374			11.92		0.732345	0.421099	7.33391				539	65.6	2.63121
	44	31.9	15.6146	15.85	0.340017	0.261552	7.0619				41	71.8	15.4054	16.06	0.627724	0.575414	8.86661				45	69	11.8408	13.78	1.46183	1.25068	1.18571	3.73579	4.09312				336a	76.4		9.3374				11.97	0.700959	0.345248	4.11683				566	62.5	0.732345
	45	50.4	14.9869	15.62	0.863121	0.627724	3.74019				42	86.4	13.6007	15				0.784656			46	32.1	14.3259	14.81	0.877098	0.69843		10.3628					339	80.9		9.13601			12.67					0.863121			570	74.5	2.69398
	46	89	16.37	16.72	0.340017			1.09852	0.810811		43	79.5	14.5946	15.59	0.967742	0.627724	10.3575				47	71.5	12.1007	13.98	1.15322	0.974553		5.44126					367	74.6		9.3374			12.5		0.829119	0.342633	5.85876				571	71.2	1.50392
	47	83.7	16.2947	16.65	0.470793			0.863121	0.810811		44	8.4	16.687	16.71	0.496949	0.444638	11.7437				48	81.9	11.922	13.95	0.600975					1.44559	1.36437		381	88.2		9.41587			12.89					1.20314	1.09852		571b	64.3	4.89887
	48	71.9	14.4115	15.43	0.601569	0.523104	4.60331				45	65.8	14.7254	15.58	0.993897	0.7585	7.63731				49	63.6	13.0103	14.46	1.08825	0.925826		5.52247					387	81.8		8.26504			12.64					1.04621			580	65.58	2.8483
	49	70.5	14.9085	15.74	0.627724	0.549259	3.66173				46	76.8	13.5484	14.9	0.732345	0.470793	9.52049				50	70.1	11.3373	13.48	0.925826	0.877098		3.65457					395	70.9		10.0697			12.7		0.724499	0.25109	5.31735				593	80.6	2.78553
	50	65.4	16.1901	16.55	1.04621	0.627724	9.70357				47	53.7	15.17	15.8	0.915432	0.7585	7.97733				51	17.1	13.7087	13.93	0.600975	0.568489		8.36492					443	59.5		4.04882				11.32	0.816042	0.285092	2.04534				603	74.2	2.88753
	51	59.6	16.8178	16.93	1.04621	0.836966	6.98344				48	34.7	15.1177	15.48	0.680035	0.601569	4.551				52	40.7	12.6042	13.69	0.812128	0.600975		8.83595					448	84.8		4.73409				12.15				1.20314	1.04621		609	57.14	2.70968
	52	76.8	16.5824	16.83	0.810811	0.523104	7.27114				49	47.8	14.9085	15.52	0.941587	0.523104	11.2206				53	57.9	11.1424	13.14	0.990796	0.893341		4.06064					458	86.7		8.29119			12.81					1.46469	1.46469		615	66.6	5.76722
	53	51.3	16.5301	16.7	0.810811	0.549259	7.21883				50	61.2	13.2345	14.55	1.43854	0.889276	8.23888				54	55.9	13.3189	14.54	0.844613	0.812128		4.30428					463	62.4		10.1744			12.34		0.967742	0.311247	7.13514				634	88.8	2.83261
	53a	10.6	14.7254	14.76	0.444638	0.366173	5.64952				51	84.4	13.5745	14.99				0.941587			55	68.3	12.8316	14.4	0.519762	0.406064		4.27179					500	56.6		9.60157			12.12		1.07759	0.614647	6.12554				641	70.09	3.89189
	54	47.1	15.9285	16.24	0.680035	0.444638	10.0697				52a	77.1	14.333	15.4	0.627724	0.523104	4.47254				56	29.7	12.9616	13.64	0.682187	0.63346		3.89821					517b	89.3		9.78204			12.93					0.889276			645	56	2.19965
	55	61.6	14.6469	15.47	0.444638	0.340017	8.08195				52b	23.3	15.2223	15.4	0.523104	0.418483	6.25109				57	29	12.7829	13.47	0.779643	0.69843		5.44126					539	65.6		9.61203			12.32		0.708806	0.431561	5.81168				652	60	4.483
	56	60	16.2685	16.6	0.863121	0.836966	5.38797				53	61.5	13.8099	14.94	1.04621	0.810811	6.93112				58	58.8	12.1819	13.84	1.00704	0.747158		7.34164					566	62.5		11.0113			13.09		0.946818	0.496949	7.46992				659	49.8	2.68614
	56a	42.8	15.7454	16.05	0.889276	0.627724	8.84045				54a	65.9	14.5423	15.45	1.09852	0.863121	9.62511				59	22	14.0011	14.31	0.519762	0.373579		6.85436					570	74.5		10.3836			12.94		0.931125	0.185702	7.44377				660	58.9	4.79948
	56b	61.3	17.0009	17.07	0.810811	0.680035	5.25719				54b	43.7	14.8038	15.39	0.549259	0.444638	6.95728				60	87.2	11.4348	13.67	0.438549					1.13698	1.12074		571	71.2		9.23278			12.39		0.771578	0.279861	5.47428				663	70.4	3.85004
	57	87.3	16.6085	16.84	0.418483			1.20314	1.02005		55	81.2	12.476	14.3				1.09852			61	78.7	11.9058	13.93	1.03952	0.779643		7.95885					571b	64.3		9.54664			12.27		0.889276	0.35048	8.0401				675	88	2.67568
	57a	87.3	16.6085	16.84	0.418483			0.601569			56	60	14.4115	15.32	0.810811	0.575414	8.10811				62	71.4	11.7759	13.78	1.20195	1.13698		4.84028					580	65.6		9.52049			12.27		0.70619	0.489102	5.81168				708	77.3	2.17611
	58	41.1	15.3269	15.73	0.915432	0.575414	10.0174				57	60.1	16.1639	16.53	1.02005	0.418483	10.2267				63	13.9	14.2447	14.37	0.438549	0.357336		6.12344					593	80.6		8.68352			12.64		0.496949			1.2816	1.15083		710	77.6	3.20139
	59	21.2	14.7515	15.01	0.523104	0.470793	3.37402				58	79.7	13.5222	14.91	1.09852	0.941587	6.61726				64	68.4	12.5717	14.24	0.893341	0.600975		7.97509					603	74.2		8.39582			12.42		1.07236	0.400174	4.22145				712	86.9	2.8823
	60a	57.8	15.51	16.04	1.04621	0.836966	6.068				59a	8.1	15.7716	15.82	0.366173	0.313862	2.06626				65	59.7	11.4185	13.36	0.730915	0.617217		5.84732					609	56.6		8.10811				11.24	0.863121	0.366173	6.04185				724	63.5	4.29991
	60b	11.7	16.0331	16.03	0.496949	0.340017	9.15432				59b	52.8	15.6408	16.07	0.941587	0.732345	11.7175				66	58	12.1657	13.82	0.7634	0.373579		8.47861					615	66.6		9.83435			12.49		0.601569	0.32694	6.79773				740	74.8	4.69224
	61a	67.3	14.0976	15.2	0.65388	0.601569	5.80645				59c	67.9	15.0392	15.78	0.941587	0.65388	10.5667				67	68.1	13.0428	14.53	0.649702	0.600975		4.8078					634	88.8		8.65737			12.9					0.967742	0.915432		742	61	6.73235
	61b	75	15.9024	16.39	1.04621	0.889276	4.47254				60	67	14.49	15.46	0.889276	0.732345	4.81255				68	87.2	10.3465	13.01	0.617217					1.21819	1.03952		641	70.1		9.04969			12.35		0.967742	0.507411	7.03313				756	76.5	6.39756
	62	50.5	16.5562	16.77	0.889276	0.836966	6.69573				61	57.1	13.7053	14.82	0.941587	0.810811	5.04795				69	73.6	11.6134	13.69	1.13698	0.958311		5.36004					645	56.8		10.823			12.97		0.68265	0.421099	6.03662				758	61.1	3.2354
	63	40.3	17.1578	17.2	1.09852	0.810811	5.10026				62a	54.2	14.9346	15.6	1.04621	0.784656	7.84656				70	14.6	12.523	12.77	0.373579	0.357336		5.13265					652	60		10.3575			12.69		0.986051	0.400174	8.49782				761	71.9	3.29555
	64	55.1	15.51	16.02	0.732345	0.627724	3.68788				62b	49.1	15.1177	15.68	1.2816	0.70619	10.9852				71													49.8		11.1944					0.889276	0.423714	6.3714				764	77.1	3.95466
	65	79.4	16.4516	16.77	1.09852	0.836966	10.7236				63	25.6	16.3993	16.49	0.680035	0.575414	7.08806				72	29.9	13.725	14.26	0.324851	0.308609		3.88197					660	58.9		10.5144			12.76		1.16652	0.418483	5.33043				765	87.1	2.30427
	66a	55.3	15.8239	16.23	0.863121	0.549259	9.78204				64	15.3	14.6207	14.73	0.601569	0.523104	3.87097				73												663	70.4		9.07585			12.36		0.740192	0.353095	4.52485				ex006	52.98	1.54839
	66b	53.9	15.7977	16.22	0.680035	0.313862	7.37576				65	42.3	15.3269	15.74	0.680035	0.627724	1.22929				74	31.7	13.4001	14.05	0.552247	0.503519		6.88684					675	88		9.03662			12.88					1.12467	1.12467		ex007	85.78	4.57193
	67	69.2	16.0593	16.5	0.810811	0.418483	12.1883				66	59.4	13.4961	14.72	1.04621	0.889276	3.87097				75	58.6	12.5555	14.08	1.12074	0.7634		7.04927					708	77.3		9.54141			12.59		1.14821	0.533566	5.70183				ex007	85.78	3.08893
	68	18.6	16.4516	16.54	0.444638	0.418483	7.53269				67a	54.2	15.0392	15.66	0.70619	0.601569	5.98954				76	64.2	12.2956	14.01	0.82837	0.665945		4.98646					710	77.6		8.26504			12.51		0.810811	0.470793	3.95466				ex007	85.78	1.93025
	69	4.3	15.9024	15.91	0.418483	0.287707	6.46033				67b	49	13.6792	14.68	0.680035	0.523104	2.90323				77	15.8	13.8062	14	0.406064	0.308609		5.14889					712	86.9		7.92502			12.8					1.07236	1.04621		ex010	81.9	4.97472
	70	29.5	16.007	16.17	0.313862	0.261552	7.87271				68	16.3	15.51	15.59	0.575414	0.444638	7.66347				78	54.7	12.9778	14.29	0.990796	0.747158		6.00975					724	63.5		9.36879			12.15		1.02005	0.201395	3.72973				ex010	81.9	2.12903
	71	67.8	15.8762	16.36	0.784656	0.470793	8.13426				69	29.5	14.49	14.9	0.575414	0.496949	5.88492				79	27	13.5463	14.04	0.454792	0.438549		4.72658					740	74.8		10.2005			12.83		0.941587	0.619878	2.77245
	72	55.5	14.8038	15.54	0.70619	0.65388	6.64342				70	41.6	14.15	14.83	0.993897	0.889276	3.00785				80	56.4	12.2144	13.81	0.714672	0.568489		6.51326					742	61		11.299			13.31		1.09852	0.95728	6.03923
	73	50.1	16.007	16.33	0.967742	0.810811	8.94507				71	38.9	14.6992	15.23	0.7585	0.65388	2.40628				81	44.8	13.0753	14.15	0.519762	0.373579		8.65728					756	76.5		9.23278			12.55		0.993897	0.507411	7.32345
	74	73.4	15.7454	16.26	0.65388	0.392328	8.26504				72	33.6	14.8561	15.3	0.732345	0.470793	9.8082				82	79.9	10.6876	13.18	0.779643	0.584732		6.2209					758	61.1		9.23278			12.06		1.04621	0.588492	5.67829
	75	56.1	16.5039	16.72	1.15083	0.496949	12.8945				73a	57.9	15.17	15.84	0.915432	0.836966	2.24935				83	16	12.3931	12.7	0.292366	0.227396		7.43909					761	71.9		8.99738			12.4		0.784656	0.177855	4.15867
	76	31.5	16.6609	16.78	0.444638	0.418483	5.88492				73b	39	13.8099	14.54	0.627724	0.444638	10.1482				84	65.7	12.1494	13.94	0.812128	0.649702		6.13969					764	77.1		7.34961			12.41		0.672188	0.523104	5.18657
	77	44.3	15.0392	15.54	0.784656	0.496949	9.72973				74	45.9	14.5161	15.2	0.732345	0.627724	12.1622				85	55.9	13.124	14.41	0.877098	0.63346		9.56687					765	87.1		9.70357			12.87					1.07236	0.967742
	79a	77.4	15.1439	15.9	0.836966	0.784656	4.49869				75	45.3	15.6931	16.08	0.836966	0.680035	4.551				86	25.1	13.2052	13.7	0.324851	0.324851		2.9399					ex006	52.98		8.85876					0.899738	0.53095	6.30863
	79b	22.5	15.7454	15.84	0.392328	0.366173	5.41412				76	48.9	15.2746	15.82	0.836966	0.601569	8.26504				87	54.5	12.1494	13.73	0.649702	0.600975		5.58744					ex007	85.78		9.3374								0.949433	0.889276
	80	29.2	16.7393	16.77	0.418483	0.340017	12.3191				77	33.4	14.333	14.81	0.732345	0.575414	4.76024				88	23.2	13.7087	14.08	0.487277	0.422306		5.50623					ex007	85.78		9.3374								0.949433	0.889276
	81a	25.7	16.5039	16.58	0.418483	0.313862	6.43418				78	74.2	16.007	16.45	0.967742	0.732345	2.82476				89	86.8	13.0265	14.65					0.357336	1.5268	1.51056		ex007	85.78		9.3374								0.949433	0.889276
	81b	49.6	16.5039	16.69	0.941587	0.470793	11.8221				79	39.3	13.7576	14.55	0.941587	0.627724	9.70357				90	89.2	12.7991	14.51					0.406064	1.88414	1.60801		ex010	81.9		6.74019								1.32607	1.21099
	82	73.9	15.85	16.39	0.7585	0.601569	5.70183				80	12.9	15.3269	15.37	0.418483	0.366173	4.49869				91												ex010	81.9		6.74019								1.32607	1.21099
	83	69.4	16.7132	16.88	0.993897	0.784656	6.32956				81	72.2	15.51	16.13	1.07236	0.863121	4.18483				92	57.8	12.6692	14.14	1.08825	0.665945		8.02382
	84a	73.5	15.7454	16.26	0.575414	0.470793	6.87881				82	49.9	14.4638	15.26	1.22929	0.836966	5.36181				93	62.9	12.2144	13.93	0.812128	0.649702		3.94694					3	11.6	11.9268			12.13			0.523104	0.418483	2.24935
	84b	23.2	17.0532	17.11	0.549259	0.496949	5.70183				83	36	15.0392	15.42	0.993897	0.7585	4.28945				94	64.4	9.82675	12.44	0.552247	0.487277		3.91446					4	67.4	10.2005			12.73			0.627724	0.392328	4.44638
	84b2	84.6	16.2685	16.65	0.549259			0.967742	0.810811		84	76.9	13.8361	15.08	1.09852	0.732345	7.42023				95	58.9	12.8641	14.29	0.649702	0.63346		2.9399					5	30.4	11.4298			12.46			0.470793	0.366173	1.98779
	84c	14.7	17.1578	17.2	0.340017	0.209241	9.07585				85	73	15.3269	16	1.04621	0.7585	6.43418				96	39.3	12.3119	13.44	0.779643	0.665945		5.29507					6	74.1	8.91892			12.46			0.523104	0.444638	3.2694
	85	82.6	15.5885	16.22	0.680035			1.12467	0.915432												97	58	11.7109	13.52	0.877098	0.860855		3.34597					7	43.6	11.2467			12.82			0.784656	0.496949	4.28945
	85a	1.5	15.1962	15.2	0.366173	0.340017	5.67568				87	53.5	14.0976	15.03	0.732345	0.575414	4.73409				98	82	11.9545	13.97	1.15322	1.12074		6.36708					8	20	12.5806			13			0.627724	0.496949	8.13426
	86	61.7	15.51	16.07	1.30776	0.7585	6.69573				88	44.9	13.8884	14.74	0.863121	0.65388	5.93723				99	73.1	12.2631	14.1	0.974553	0.69843		7.098					9	63.2	10.5144			12.85			0.889276	0.784656	4.05405
	87a	35.9	17.8117	17.7	0.627724	0.549259	5.88492				89	55.6	14.2284	15.13	0.627724	0.523104	7.53269				100	52.6	13.2377	14.43	0.779643	0.665945		4.25555					10	59.9	11.2729			13.27			0.993897	0.915432	2.87707
	87b	49.6	15.5885	16.04	0.627724	0.523104	4.551				89a	18.3	15.0654	15.24	0.627724	0.523104	5.15257				101	50.8	12.6854	14.01	1.18571	0.69843		8.3974					11	66.2	9.86051			12.5			1.46469	1.22929	5.17873
	88a	83.8	16.5039	16.77	0.392328			0.836966			90	33.5	14.7515	15.22	0.496949	0.340017	4.68178				102	51.3	13.4488	14.55	0.795885	0.568489		8.6248					12	63.8	9.07585			12.14			0.70619	0.65388	3.034
	88b	38.6	16.2162	16.4	0.732345	0.496949	5.41412				91	23.9	15.7716	15.94	0.523104	0.470793	4.81255				103	80.9	12.3931	14.23	0.568489					1.51056	1.44559		13	39.8	10.5929			12.23			0.680035	0.575414	6.46033
	89	19.9	16.5301	16.55	0.523104	0.496949	11.1944				92	77.6	13.4961	14.9	0.601569	0.444638	5.20488				104	51.7	14.0661	14.99	0.974553	0.844613		3.89821					14	18.1	12.1099			12.52			0.470793	0.392328	6.74804
	90	74.7	15.3793	16.07	1.04621	0.549259	10.0436				93	76.4	14.0453	15.21	0.784656	0.575414	8.16042				105	42.7	12.3606	13.58	0.519762	0.422306		5.19762					15	35.8	11.2467			12.54			0.470793	0.340017	5.3095
	91	9.2	16.3993	16.41	0.496949	0.470793	5.36181				94	8.7	15.1177	15.13	0.496949	0.392328	5.83261				106	40.4	11.8733	13.15	0.324851	0.276123		4.23931					16a	12.9	11.4298			11.72			0.366173	0.287707	4.94333
	92	86.5	16.3993	16.71	0.470793			1.02005	0.7585		95	69.2	13.6269	14.9	0.863121	0.601569	10.1744				107	41.1	11.5809	12.97	0.665945	0.552247		7.89388					17	7.9	12.816			12.89			0.444638	0.418483	8.73583
	93	84.8	16.2947	16.65	0.496949			0.967742	0.7585		96	65.8	15.9547	16.42	1.20314	1.09852	1.93548				108	50.2	13.0103	14.22	0.714672	0.665945		4.6941					18	18.8	12.5545			12.94			0.444638	0.340017	5.46643
	94	41.1	16.007	16.27	0.523104	0.366173	10.6452				97	61.7	16.7393	16.87	0.7585	0.549259	5.67568				109	79.8	9.79426	12.67	0.568489	0.438549		4.17434					21	32	11.2467			12.39			0.418483	0.366173	4.42023
	95	74.9	16.8963	17.02	1.15083	0.915432	7.71578				98	10.4	15.4577	15.54	0.444638	0.392328	5.80645				110	42.9	13.189	14.18	0.536004	0.503519		6.13969					22	38.2	11.8221			13.05			0.523104	0.366173	9.44202
	96	79.5	15.6408	16.21	0.915432	0.784656	3.11247				99	78.9	14.2284	15.34	0.601569	0.496949	2.64167				111	76.5	12.0357	13.99	0.909583	0.779643		5.13265					25	49	11.0898			12.88			0.65388	0.444638	6.12031
	97	72.6	15.5885	16.19	0.627724	0.496949	7.97733				100	47	14.2807	15.07	0.941587	0.863121	7.87271				112	57.4	13.2052	14.49	1.03952	0.909583		6.23714					26	52.5	8.89276			11.7			0.7585	0.496949	6.5388
	98	41.7	14.49	15.13	0.496949	0.418483	9.70357				101	84.5	14.3592	15.48				1.09852			113	76.9	10.3628	12.95	0.779643	0.568489		7.58527					27	67.8	10.619			13			0.941587	0.65388	5.46643
	98a	65.3	15.8239	16.29	0.810811	0.496949	8.00349				102	52.1	14.8823	15.57	0.941587	0.7585	5.25719				114	43	12.7179	13.84	0.487277	0.389821		5.84732					28	61.2	11.456			13.42			0.784656	0.65388	5.15257
	99	59.7	17.1578	17.2	0.836966	0.70619	7.37576				103	88.7	14.7254	15.67				0.575414	0.523104		115	79.3	12.653	14.39	0.82837	0.536004		5.19762					29	39.2	11.116			12.58			0.549259	0.496949	4.83871
	100	83	17.7071	17.51	0.392328			1.25545	1.15083		104	70.8	14.6992	15.61	0.810811	0.523104	5.62337				116	70.2	11.386	13.52	0.714672	0.487277		5.13265					30	85.1	8.5789			12.77						0.70619
	101	57.5	16.1378	16.45	0.680035	0.366173	8.39582				105a	32.6	15.7716	16.03	0.680035	0.496949	5.62337				117	24.1	12.3443	12.94	0.471034	0.438549		3.83324					31	34.3	8.10811			10.72			0.496949	0.392328	5.36181
	102	58.2	16.2685	16.59	0.863121	0.418483	8.68352				105b	4.2	16.5039	16.5	0.418483	0.366173	9.12816				118	50.1	13.1565	14.32	0.487277	0.357336		9.12832					32	72.2	8.78814			12.39			0.392328	0.313862	3.11247
	103	55.7	16.1378	16.44	0.732345	0.627724	6.95728				106	72.5	14.8038	15.69	1.36007	1.12467	5.51874				119	53.4	12.1494	13.71	0.795885	0.389821		8.86844					33	67.3	8.50044			12.21			0.863121	0.340017	6.25109
	104	85	15.4316	16.1	0.261552			0.863121	0.810811		107a	73.8	14.6207	15.57	0.836966	0.627724	9.59895				120	37.9	12.4256	13.48	0.568489	0.519762		4.59664					34	79.8	8.47428			12.6			0.65388	0.340017	5.25719
	105	81.5	14.9869	15.85	0.444638			1.04621	0.836966		107b	59.6	12.4499	14	1.04621	0.836966	3.81866				121	35.5	12.8966	13.77	0.552247	0.406064		6.05847					35	48.4	9.52049			11.83			0.444638	0.313862	5.07411
	106	59.5	15.3269	15.92	0.575414	0.392328	8.18657				108	29.4	15.7193	15.91	0.65388	0.549259	4.13252				122	72.1	11.3211	13.5	0.844613	0.552247		6.9843					36	71.9	10.7498			13.14			0.70619	0.601569	5.93723
	107	81.6	14.7515	15.72	0.680035	0.418483	10.1221				109a	89.5	14.6469	15.61				1.25545	1.04621		123	87.9	11.3698	13.63	0.69843					1.46183	1.25068		37	61.9	10.5667			12.86			1.02005	0.680035	6.87881
	108	1.9	16.6347	16.6	0.340017	0.313862	8.60506				109b	74.3	14.6992	15.63	0.810811	0.627724	2.43243				124	42	12.8641	13.92	0.63346	0.454792		7.13048					38	71.1	9.78204			12.53			0.863121	0.627724	6.25109
	109	42.5	16.687	16.82	0.784656	0.418483	8.10811				110	81.6	14.5684	15.6				0.993897			125	79.8	10.8988	13.31	1.10449	0.649702		5.40877					39	23.5	12.7376			13.25			0.470793	0.392328	8.0558
	110	47.9	14.78	15.45	0.523104	0.444638	6.95728				111	53.3	15.4054	15.93	1.02005	0.889276	3.47864				126												40	19.9	11.4821			12.05			0.392328	0.340017	4.36792
	111	39.9	15.4839	15.87	0.627724	0.470793	6.80035				112	47.9	14.8038	15.45	0.941587	0.784656	4.31561				127	89.8	12.1982	14.14	0.471034					1.86789	1.68923		41a	74.5	9.96513			12.68			0.70619	0.523104	3.68788
	112	36.5	17.7855	17.69	0.470793	0.418483	8.5789				113	42.6	13.8099	14.62	0.65388	0.575414	2.2755				128	84	12.8154	14.51						1.39686			41b	38	11.2206			12.61			0.444638	0.392328	4.52485
	113	33.4	15.6931	15.95	0.627724	0.418483	6.90497				114	25.6	14.2284	14.56	0.575414	0.470793	3.76635				129	59.4	12.7017	14.19	0.877098	0.7634		4.72658					42a	69.7	10.0174			12.65			0.70619	0.470793	4.23714
	114a	20.2	17.1055	17.11	0.549259	0.523104	3.66173				115	40.9	14.9869	15.49	0.65388	0.601569	2.48474				130	32.6	13.6762	14.3	0.422306	0.389821		6.64321					42b	43.2	10.0697			12			0.627724	0.523104	4.89102
	114b	76.4	15.0654	15.89	0.863121	0.7585	3.2694				116a	89.9	15.3531	16.1				1.33391	1.12467		131	49.5	12.0682	13.56	0.63346	0.600975		3.21603					43	54.3	11.0898			13.02			0.601569	0.444638	7.50654
	115	33.3	16.3993	16.53	0.627724	0.523104	8.0558				116b	87.2	13.2868	14.81				0.993897			131b	21.5	13.3351	13.71	0.568489	0.519762		4.25555					44	49.4	10.9067			12.77			0.680035	0.470793	7.84656
	116a	41.3	16.1639	16.42	0.680035	0.418483	6.27724				117	38.9	14.8038	15.31	0.418483	0.366173	7.66347				132	66.6	12.7829	14.35	0.812128	0.682187		6.9843					45	19.6	11.796			12.31			0.444638	0.313862	5.36181
	116b	87.6	16.007	16.47	0.313862			1.02005	0.993897		118	63.1	14.6992	15.55	0.915432	0.732345	3.53095				133	65	12.7017	14.28	0.795885	0.503519		8.25122					46	23.8	11.7698			12.46			0.444638	0.313862	5.62337
	116c	86.7	17.3932	17.33	0.444638			0.915432	0.863121		119	61.5	15.3269	15.94	0.65388	0.575414	4.68178				134	50.8	12.8641	14.13	0.63346	0.584732		6.23714					47	19.4	12.1883			12.64			0.523104	0.470793	5.12642
	116c2	86.7	17.3932	17.33	0.444638			0.863121	0.784656		120	44.5	13.4438	14.37	0.70619	0.627724	3.37402				135	49.5	12.1007	13.58	0.7634	0.454792		5.94478					48	75.8	10.3836			12.96			0.392328	0.261552	1.64778
	117	72.7	16.1116	16.51	0.680035	0.340017	8.02964				121	75.3	16.0593	16.51	0.549259	0.470793	3.60942				136	83.2	12.1007	14.07						1.54304			49	50.9	11.3252			13.09			0.70619	0.627724	3.84481
	118	24.3	17.0009	17.02	0.418483	0.366173	5.0218				122	15	16.1901	16.24	0.575414	0.523104	5.64952				137	76.1	11.987	13.95	0.682187	0.600975		4.67786					50	42.6	11.4298			12.91			0.65388	0.575414	4.05405
	119a	44.8	16.7916	16.9	0.70619	0.65388	4.76024				123	10.2	15.7716	15.83	0.418483	0.313862	4.57716				138	81.7	10.2978	12.95						0.925826			51	62	10.4359			12.78			0.889276	0.575414	7.24499
	119b	15.8	16.1378	16.15	0.523104	0.444638	10.9329				124	2.9	14.0976	14.11	0.366173	0.313862	3.87097				139	78.5	12.5555	14.33	0.714672	0.341094		6.64321					53	39.4	13.0514			13.99			0.7585	0.627724	8.65737
	120	15.5	15.4054	15.49	0.470793	0.313862	9.10201				125	36.2	14.2023	14.79	0.732345	0.65388	1.98779				140	88.7	10.2653	12.96	0.568489					1.49432	1.13698		54	63.9	9.72973			12.37			0.967742	0.784656	5.57105
	121a	87.2	15.4054	16.1	0.392328			1.09852	0.863121		126	88.53	16.3731	16.72				1.07236	1.04621		141	42.5	14.3259	15.01	0.617217	0.503519		7.37412					55	13.1	12.3976			12.62			0.496949	0.444638	4.7864
	121b	45.7	15.2485	15.71	0.680035	0.549259	10.1744				127a	29	14.5684	14.97	0.523104	0.418483	3.24324				142	64.4	11.4835	13.49	0.958311	0.925826		2.9399					56	60.3	10.0436			12.49			0.7585	0.601569	5.36181
	122	41.2	16.687	16.81	0.836966	0.496949	12.0575				127b	41.2	15.0654	15.58	0.418483	0.313862	9.65126				142-1	64.2	11.4185	13.45	0.958311	0.942068		3.03736
	123a	23.5	16.4516	16.57	0.470793	0.366173	9.91282				128	6.1	16.007	16.01	0.444638	0.313862	9.25894				143	77.2	11.7596	13.82	1.05577	0.600975		7.84515					58	88.4	8.5789			12.88						0.915432	0.915432
	123b	62.8	16.1901	16.54	0.65388	0.627724	7.84656				129	39.1	15.1177	15.55	0.810811	0.549259	7.50654				144	78.3	11.0937	13.42	0.747158	0.487277		3.75203					59	67	8.13426			12.17			0.418483	0.340017	2.77245
	124	50.7	16.0331	16.34	1.07236	0.941587	5.49259				130	59.1	13.8361	14.91	0.863121	0.732345	3.81866				145	16.4	12.7342	13.02	0.600975	0.568489		5.94478					60	60.7	9.93897			12.44			0.967742	0.601569	5.04795
	125	46.7	16.6085	16.75	0.784656	0.261552	11.4298				131	77.4	15.667	16.27	0.70619	0.523104	3.5048				146	8.8	13.3027	13.38	0.373579	0.357336		1.98159					61	66.9	10.6452			13			1.04621	0.65388	5.85876
	126	41.1	16.0854	16.34	0.784656	0.392328	7.11421				132	46.1	15.2223	15.71	0.627724	0.575414	2.11857				147	32.6	12.4905	13.36	0.422306	0.406064		1.98159					62	69.3	9.78204			12.5			0.915432	0.680035	5.23104
	126a	35.8	13.1037	13.93	0.340017	0.156931	8.0558				133	44.4	14.2807	15.03	0.680035	0.366173	10.0959				148	88.6	11.9383	13.98	0.795885					1.5268	1.42934		63	77.2	7.40192			12.42			0.863121	0.575414	3.63557
	127	44.8	16.7393	16.82	0.523104	0.496949	2.98169				134	79.4	14.6731	15.65	1.12467	0.967742	1.83086				149	37.8	13.8062	14.52	0.519762	0.422306		5.42501					64	85.7	9.75588			12.83						1.15083	1.09852
	128a	41.2	16.4516	16.66	0.863121	0.784656	4.49869				135a	56.6	14.0715	15.08	0.967742	0.784656	4.44638				150	71.3	11.9545	13.88	0.779643	0.714672		4.17434					65	5.8	11.9268			11.98			0.366173	0.313862	5.25719
	128b	52.1	16.6347	16.77	0.601569	0.523104	5.41412				135b	49.7	15.2746	15.83	0.915432	0.627724	5.7803				151	73.7	11.2561	13.48	0.974553	0.730915		5.61992					66	68.4	10.0959			12.68			0.70619	0.627724	6.068
	129	50.4	16.0854	16.41	1.07236	0.941587	4.18483				136a	34.6	14.7777	15.24	0.680035	0.496949	7.48038				151b	84.2	11.9058	13.95	0.958311					1.38062	1.23443		67	78.6	9.78204			12.64			0.7585	0.601569	5.04795
	130	76.4	15.9024	16.39	0.627724	0.470793	5.10026				136b	10.6	13.1561	13.31	0.340017	0.287707	4.00174				152	66.3	11.8896	13.78	1.13698	0.63346		8.31619					69	61.3	9.31125			12.07			0.65388	0.575414	4.18483
	131	46.1	16.2947	16.53	0.967742	0.7585	6.69573				137	51.4	13.5484	14.58	0.680035	0.601569	3.37402				153	34.3	13.3676	14.1	0.795885	0.487277		7.58527					70	62	10.0436			12.53			0.496949	0.418483	4.05405
	132	43.3	15.5623	15.98	0.7585	0.523104	9.49433				137a	44.6	13.9407	14.74	0.575414	0.470793	3.66173				154	57.5	11.6134	13.44	0.617217	0.503519		5.10016					71	82.2	7.71578			12.61						0.470793
	133	73.1	15.4316	16.07	1.12467	0.627724	10.2005				138	61.6	15.51	16.07	0.627724	0.575414	1.85702				155	88.3	9.33947	12.9	0.438549					1.02328	0.958311		72	47.8	9.46818			11.77			0.65388	0.418483	4.44638
	134	59.4	16.2162	16.53	0.70619	0.575414	8.16042				139	70.4	14.4115	15.42	0.7585	0.627724	2.32781				156	67.7	12.653	14.28	1.08825	0.990796		5.14889					73	40.9	11.4037			12.84			0.65388	0.470793	7.0619
	135	69.9	16.3993	16.69	1.12467	0.70619	9.41587				140	59.3	13.7053	14.85	0.889276	0.680035	6.14647				157	72.2	12.1982	14.05	1.00704	0.682187		6.62696					74	66.4	9.41587			12.25			0.70619	0.627724	3.13862
	136	70.4	16.4255	16.69	0.810811	0.680035	5.80645				141	11.4	15.17	15.25	0.523104	0.392328	9.67742				158	42.3	12.8641	13.93	0.617217	0.471034		6.13969					77	33.4	11.0898			12.33			0.627724	0.470793	8.10811
	136a	81.2	17.2101	17.21	0.523104			0.889276			142	83	15.4839	16.16				1.25545	1.12467		159	19	13.595	13.88	0.422306	0.373579		5.37629					78	56.1	10.3575			12.59			0.65388	0.601569	1.93548
	137	79.5	16.1378	16.52	0.601569	0.444638	10.619				143	88.4	14.9608	15.86				0.915432			160	48.3	12.9616	14.14	0.63346	0.552247		5.60368					79	51.5	10.959			12.86			0.627724	0.496949	5.5449
	138	88.7	15.7454	16.29	0.392328			1.36007	1.25545		144	18.1	15.5885	15.7	0.627724	0.523104	10.3575				161	76.6	11.4023	13.59	1.00704	0.730915		6.59448					80	75.5	9.02354			12.51			0.70619	0.627724	2.43243
	139	61	17.0009	17.07	1.43854	1.17698	7.61116				145	74.2	14.2023	15.32	0.967742	0.836966	2.17088				162	37.1	12.653	13.62	0.665945	0.552247		4.5804					81	75.7	10.9852			13.33			0.627724	0.549259	4.10636
	140	54.4	17.5501	17.49	1.17698	0.863121	9.3374				146	56.1	15.6146	16.1	0.575414	0.418483	10.0436				163	29.1	13.8874	14.38	0.471034	0.422306		3.89821					82	13.6	10.3051			10.75			0.444638	0.392328	6.3034
	141a	2.2	16.007	16	0.366173	0.340017	6.48649				147a	75.3	15.1177	15.89	1.20314	1.07236	4.31561				164	33.1	13.9848	14.55	0.503519	0.406064		7.61776					83	84.81	9.16739			12.79						0.941587	0.941587
	141b	0.1	15.3008	15.3	0.366173	0.340017	5.62337				147b	59.9	13.7053	14.86	0.627724	0.523104	2.95554				165	57.8	12.4093	13.97	1.13698	0.7634		7.89388					84	22.8	10.7759			11.61			0.470793	0.340017	6.35571
	142	17.8	16.0854	16.17	0.418483	0.366173	11.2729				148a	69.4	15.2746	15.99	0.967742	0.627724	8.29119				166	80.1	13.124	14.68	0.925826	0.600975		5.58744					85	65	9.38971			12.21			1.12467	0.784656	4.08021
	143a	39.4	14.6731	15.24	0.470793	0.392328	5.62337				148b	82.3	13.7838	15.11	0.7585	0.65388	6.04185				167	19.1	13.3676	13.67	0.324851	0.276123		9.01462					86	25.1	11.5344			12.32			0.523104	0.392328	5.3095
	143b	23.4	16.4255	16.48	0.575414	0.496949	4.15867				149a	82.5	13.7576	15.11				0.810811			168	23.5	14.3259	14.63	0.730915	0.406064		9.61559					87	32.3	10.6713			11.98			0.418483	0.366173	3.58326
	144a	86.3	17.1316	17.14				1.30776	1.20314		149b	69.7	15.1177	15.86	1.2816	1.07236	5.67568				169	66.6	12.4743	14.15	0.82837	0.714672		6.12344					89	33.1	11.3775			12.53			0.470793	0.392328	6.80035
	144a2	86.3	17.1316	17.14				1.15083	1.09852		150	72.9	13.5484	14.87	0.7585	0.65388	3.60942				170	47.7	11.8246	13.34	0.617217	0.600975		3.41094					91	51.7	10.1744			12.35			0.70619	0.549259	5.64952
	144b	48.7	15.6931	16.11	0.523104	0.470793	7.48038				151a	71.7	14.6469	15.55	0.732345	0.627724	2.64167				171	7.6	13.2377	13.3	0.454792	0.438549		2.64754					92	44.9	9.52049			11.7			0.889276	0.523104	7.16652
	145	43.7	15.5885	15.99	0.732345	0.496949	4.7864				151b	60.9	16.1116	16.47	0.810811	0.70619	9.25894				172	59.2	12.9128	14.32	1.38062	0.942068		9.53438					93	56.1	10.4621			12.66			0.784656	0.680035	4.0279
	146	75.3	16.1378	16.51	0.784656	0.549259	6.09416				152a	51.9	14.2807	15.15	0.627724	0.470793	3.71404				173												94	85.4	9.44202			12.81						0.863121
	147	41.2	17.94	17.75	0.418483	0.313862	4.42023				152b	60.9	16.1116	16.47	1.02005	0.601569	10.0697				174	45.2	13.725	14.62	0.730915	0.682187		4.5804					96	71.1	9.41587			12.4			0.915432	0.65388	5.96338
	148	31.4	15.9285	16.1	0.523104	0.470793	7.37576				153	81.1	13.3391	14.8	1.04621	0.863121	7.14037				175	82.9	11.2398	13.54	1.07201					1.96535	1.6405		97	61	10.0697			12.53			0.889276	0.732345	5.5449
	149	89	15.7454	16.29	0.287707			1.12467	0.941587		154	19.5	15.1177	15.25	0.680035	0.418483	9.59895				176	74.7	11.8896	13.88	0.942068	0.795885		5.19762					98	86	8.70968			12.81
	150	56.3	15.0131	15.69	0.889276	0.732345	4.0279				155	31	14.8823	15.26	0.549259	0.470793	2.72014				177	29.7	13.4164	14.01	0.584732	0.568489		8.36492					99	41.4	11.7175			13.08			0.444638	0.287707	7.68963
	151	60.4	15.3531	15.99	0.7585	0.523104	8.8143				156	62.4	13.4961	14.76	0.810811	0.392328	8.13426				178	67.6	11.922	13.82	1.12074	0.877098		6.65945					100	66.6	9.86051			12.53			0.444638	0.313862	6.64342
	152a	30.3	16.2685	16.43	0.627724	0.523104	10.7498				157	55.9	15.4316	15.96	0.863121	0.680035	3.53095				179	22.8	12.523	13.04	0.487277	0.373579		7.13048					101	64	9.99128			12.54			0.680035	0.392328	4.23714
	152b	30.9	16.007	16.18	0.470793	0.444638	4.15867				158a	84.7	14.9346	15.79				1.02005			180	66.6	12.1819	13.97	0.747158	0.665945		5.06768					102	40.3	8.70968			11.11			0.627724	0.470793	3.24324
	153a	70.7	16.6609	16.89	1.02005	0.967742	4.2633				158b	21.4	15.85	16.01	0.680035	0.549259	6.46033				181	44	12.1819	13.49	1.15322	0.730915		7.76394					104	71.6	9.8082			12.55			0.575414	0.470793	3.034
	153b	65.8	14.5946	15.51	0.366173	0.235397	12.5283				159	53.5	14.9608	15.66	0.915432	0.810811	2.95554				181b	87.7	12.2144	14.15	0.747158					1.72171	1.70547		105	76.1	9.59895			12.56			0.680035	0.444638	5.57105
	154	30.2	15.3008	15.58	0.496949	0.470793	3.89712				160a	70.1	14.2023	15.29	1.2816	1.15083	3.06016				182	65.7	12.0357	13.87	1.03952	0.893341		5.14889					106	48	10.6713			12.57			0.627724	0.392328	6.01569
	155	57	15.9024	16.31	0.810811	0.732345	8.36966				160b	39.1	15.8239	16.09	0.784656	0.627724	6.51264				183	31	13.4488	14.07	0.487277	0.438549		8.68977					107	22	12.7376			13.2			0.470793	0.392328	4.89102
	156	1.2	17.0009	17	0.366173	0.287707	8.5789				161	21.8	15.667	15.83	0.70619	0.65388	5.5449				184	48.6	13.53	14.55	0.519762	0.487277		4.19058					108	21.9	12.7899			13.25			0.392328	0.340017	6.17262
	157	42.1	18.0209	17.83	0.836966	0.366173	13.8099				162	32.8	14.2284	14.72	0.444638	0.287707	3.84481				185	76.2	11.8896	13.89	1.08825	0.990796		3.11857					109	41.7	11.4821			12.92			0.601569	0.523104	4.81255
	158	79.3	15.7454	16.27	0.523104	0.313862	6.5388				163	28.7	13.3653	13.97	0.549259	0.261552	9.36356				186	56.9	12.052	13.72	0.600975	0.422306		5.13265					110	50	10.8544			12.75			0.941587	0.836966	2.48474
	159a	86.2	16.007	16.47	0.549259			1.36007	0.967742		164a	72.7	14.5946	15.56	1.20314	1.02005	3.74019				187	43.2	10.9475	12.6	0.503519	0.438549		4.43422					111	29.3	11.2467			12.27			0.444638	0.392328	7.585
	159b	86.2	16.007	16.47	0.549259			0.915432	0.7585		164b	53.9	14.333	15.18	0.680035	0.601569	1.38622				188	34.7	13.3189	14.07	0.860855	0.665945		9.01462					112	29	10.4098			11.63			0.261552	0.209241	4.44638
	160	58.6	16.4516	16.73	1.25545	0.732345	11.9791				165	51.9	13.2607	14.46	0.784656	0.680035	3.94943				189	60.1	11.6297	13.51	0.552247	0.519762		5.40877					113	84.5	10.1351			12.87						0.732345
	161	43.3	16.347	16.51	1.20314	1.17698	4.81255				166	74.3	14.7515	15.7	1.25545	0.967742	9.28509				189b	64.5	12.0032	13.82	0.69843	0.503519		7.7477					114	28.7	10.8282			11.93			0.523104	0.444638	7.00959
	161a	59.1	15.5623	16.12	1.07236	0.65388	7.32345				167	85	14.6992	15.67				1.41238	1.17698		190	88.7	12.3119	14.21	0.422306					1.23443	1.18571		115	72	8.44813			12.36			0.915432	0.575414	5.67568
	162	31	15.9024	16.1	0.575414	0.470793	8.60506				168	60.9	14.5684	15.46	0.7585	0.65388	2.01395				191	54	14.1473	15.08	0.925826	0.730915		9.43692					116	69.6	10.2005			12.77			0.496949	0.287707	5.67568
	163	24	16.2162	16.3	0.523104	0.470793	7.76809				169	51.3	14.6207	15.35	1.15083	0.863121	6.38187				192	69	11.6297	13.65	0.747158	0.600975		6.41581					119b	54.5	10.4359			12.6			0.470793	0.340017	5.88492
	164	82	17.4455	17.33	0.863121			1.20314			170	46.6	13.7576	14.7	0.889276	0.810811	4.36792				193	70.8	11.4185	13.54	0.893341	0.795885		6.13969					120	22.7	12.7114			13.2			0.444638	0.313862	7.2973
	165	62	15.5362	16.07	0.627724	0.470793	9.31125				171	43.5	14.7254	15.31	1.17698	1.07236	6.38187				194	46.8	13.6925	14.63	0.730915	0.649702		7.04927					122	79.6	9.10201			12.63			1.12467	0.993897	1.64778
	166	71.9	15.6408	16.19	1.30776	0.732345	9.23278				172	32.6	14.15	14.64	0.863121	0.496949	11.3514				195	73.2	12.458	14.22	0.82837	0.714672		6.17217					123	60.1	10.1744			12.57			1.20314	0.836966	5.88492
	167	65	15.3269	15.96	0.784656	0.366173	10.6452				173	34.2	13.9146	14.51	0.889276	0.575414	9.62511				196	32.9	11.987	12.98	0.454792	0.324851		6.43205					124	47.7	11.3775			13.04			0.549259	0.444638	5.80645
	168	45.2	16.2685	16.52	0.810811	0.575414	8.10811				174	17.5	13.8884	14.12	0.627724	0.549259	3.42633				197	37.7	12.5555	13.57	0.536004	0.519762		3.54088					125	17.9	11.1421			11.68			0.523104	0.418483	7.08806
	169	52.5	15.9808	16.35	1.12467	0.941587	7.32345				175	73.4	15.4054	16.07	1.04621	0.967742	1.38622				198	81.2	10.7688	13.24						0.812128			127	49.9	10.6975			12.65			0.575414	0.444638	4.21099
	170	73.5	16.007	16.45	1.20314	0.680035	8.8143				176	42.6	14.9085	15.44	0.863121	0.70619	9.44202				199	39.1	12.2956	13.43	0.925826	0.63346		6.31835					128	26.7	12.0314			12.78			0.680035	0.549259	5.80645
	171	51.2	17.1578	17.2	1.09852	0.810811	9.25894				177	89.2	14.4377	15.49				0.915432			200	47.5	12.7017	13.94	0.7634	0.600975		8.04006					129	37.2	12.2406			13.32			0.784656	0.601569	6.04185
	171a	32.9	15.3008	15.62	0.680035	0.549259	6.85266				177a	22.3	12.6068	13.1	0.444638	0.340017	4.49869				201	20.8	11.922	12.46	0.389821	0.292366		5.03519					130	73.5	8.84045			12.43			0.65388	0.470793	4.57716
	172	22	17.6286	17.57	0.627724	0.575414	9.25894				178	87.1	13.5222	14.94				0.941587			202	15.1	12.6692	12.93	0.292366	0.276123		5.76611					130b	2.8	12.6853			12.7			0.392328	0.340017	7.42807
	172a	28.3	14.7777	15.13	0.575414	0.470793	5.49259				179	43.5	14.4638	15.16	0.601569	0.470793	3.58326				203	62.7	12.1007	13.86	0.909583	0.877098		5.03519					133b	16	11.9791			12.33			0.470793	0.366173	7.97733
	173	66	16.7916	16.94	0.784656	0.470793	9.75588				180	8.7	15.1177	15.13	0.470793	0.418483	4.7864				204	23.5	13.8062	14.18	0.536004	0.519762		6.07472					134	45.3	11.299			12.91			0.810811	0.601569	6.74804
	174	30.4	14.7515	15.17	0.418483	0.366173	8.55275				181	60	14.15	15.12	1.09852	1.02005	1.7524				205	66.8	13.189	14.61	1.4131	1.36437		3.96318					135	74.9	9.23278			12.5			0.601569	0.418483	5.62337
	175a	10.5	15.8239	15.83	0.392328	0.340017	7.79425				182a	62.2	14.7777	15.61	0.732345	0.65388	4.62947				206	57.6	13.124	14.44	0.909583	0.600975		7.8614					138	21	12.5545			13.01			0.496949	0.366173	9.59895
	176	35	16.4778	16.63	0.444638	0.313862	7.32345				182b	71.7	13.2607	14.73	1.09852	0.889276	4.18483				207	88.9	10.8175	13.3	0.389821					1.36437	1.26692		140	49.7	10.4882			12.5			0.549259	0.496949	4.08021
	176a	1.9	14.23	14.2	0.392328	0.366173	8.3435				183	51.4	13.8099	14.79	0.836966	0.732345	5.12642				208	6.9	13.595	13.64	0.389821	0.341094		6.51326					141	52.7	11.7437			13.42			0.392328	0.261552	7.68963
	177a	55.6	15.7193	16.16	0.680035	0.575414	3.89712				184	42.8	15.1962	15.67	0.523104	0.444638	3.40017				209	38.1	13.5625	14.34	0.63346	0.584732		8.00758					142	30.8	12.4237			13.25			0.470793	0.392328	6.77419
	177b	43.4	16.0331	16.28	0.601569	0.418483	7.8204				185	51.9	13.653	14.73	0.601569	0.496949	3.47864				210	10.8	13.5463	13.65	0.341094	0.324851		4.23931					143	31.9	11.4821			12.56			0.366173	0.261552	5.96338
	177c	21.8	14.7254	14.93	0.444638	0.366173	6.59111				186	87.9	13.8099	15.12				1.12467			211	25.1	13.3027	13.78	0.438549	0.422306		5.14889					144	85.1	7.77332			12.71						0.287707
	178	34.9	15.85	16.13	0.601569	0.444638	9.52049				187	11	15.1439	15.15	0.444638	0.366173	7.87271				212	54.6	11.5809	13.36	0.714672	0.682187		4.54792					145	80.5	10.9067			13.32						1.07236
	179	24.9	17.1578	17.2	0.496949	0.392328	6.85266				188	57.6	14.8823	15.63	0.836966	0.70619	4.73409				213	57.9	12.7829	14.22	0.730915	0.682187		5.48998					146	56.9	9.96513			12.36			0.601569	0.496949	3.2694
	180	55.4	16.1901	16.51	0.993897	0.575414	12.9468				189	55.5	15.0131	15.68	0.784656	0.627724	8.76199				214	25.5	13.7899	14.21	0.471034	0.422306		6.41581					147	74.3	9.70357			12.52			1.07236	0.889276	5.0218
	181	72.9	16.0854	16.51	0.993897	0.627724	7.92502				190	53.9	15.0392	15.66	0.732345	0.601569	6.068				215	78.6	11.9058	13.92	0.974553	0.909583		5.24635					147b	21.1	11.5867			12.19			0.627724	0.523104	7.68963
	182	48.9	16.8701	16.98	0.889276	0.680035	7.27114				191	46.3	14.4377	15.13	0.941587	0.732345	8.63121				216	81.4	12.8966	14.55						1.42934			148	76.1	8.99738			12.52			0.967742	0.65388	4.76024
	182a	55.5	18.4133	18.05	1.22929	0.810811	9.10201				192a	40	14.4638	15.1	0.680035	0.575414	3.00785				217	47.1	13.2052	14.29	0.942068	0.860855		4.17434					149	56.4	11.4821			13.33			0.915432	0.627724	8.08195
	183a	30.1	15.12	15.41	0.470793	0.418483	10.3836				192b	79.2	12.6068	14.35	1.12467	0.784656	9.07585				218	58.2	11.8083	13.58	0.795885	0.7634		6.30211					150	63.3	9.65126			12.31			0.549259	0.470793	3.89712
	183b	64.6	16.9747	17.07	0.627724	0.549259	6.38187				193	81.1	14.2023	15.35				0.993897			219	66.4	12.1819	13.96	0.990796	0.714672		6.09096					151	40.4	10.5667			12.24			0.784656	0.627724	4.39407
	184a	87.7	16.0854	16.53	0.313862			1.22929	1.07236		194	75.9	14.2023	15.33	0.941587	0.863121	3.55711				220	81.3	11.9545	13.97						1.16946			152	22.4	12.6853			13.17			0.392328	0.340017	6.5388
	184b	46.6	17.18	17.2	0.340017	0.287707	6.8265				195a	71.3	14.7515	15.68	1.20314	0.836966	9.38971				221	83.5	11.4023	13.64	1.12074					1.51056	1.15322		153	12.2	12.0052			12.22			0.523104	0.496949	6.14647
	185a	38.8	16.6609	16.8	0.575414	0.366173	9.91282				195b	75.5	14.83	15.7	0.967742	0.65388	4.0279				222	60.9	12.2794	13.94	0.877098	0.730915		6.09096					154	50.9	12.1883			13.67			0.680035	0.549259	6.09416
	185b	18.7	17.2886	17.3	0.366173	0.340017	6.27724				195c	43.3	16.3208	16.51	0.732345	0.601569	5.41412				223	80.8	12.1819	14.1	0.877098					1.07201	1.03952		155	89	9.36356			12.92						0.863121	0.784656
	186	64.7	15.2223	15.89	0.941587	0.601569	6.27724				196	26.3	14.8823	15.18	0.575414	0.523104	1.77855				224	5.7	13.725	13.75	0.438549	0.422306		6.67569					157	29.1	11.796			12.69			0.418483	0.340017	8.02964
	187a	46.4	16.7655	16.9	0.732345	0.470793	10.7236				197a	60.2	13.8622	14.99	0.65388	0.523104	3.84481				225	87.1	12.2144	14.14	0.568489					1.80292	1.62426		158	40.7	11.2729			12.74			0.496949	0.366173	6.5388
	187b	76.6	15.0392	15.83	0.7585	0.392328	7.14037				197b	89	14.3069	15.43				1.25545	1.20314		226	42	14.131	14.86	0.730915	0.519762		5.27883					159	75.6	9.18047			12.52			0.470793	0.340017	3.84481
	187c	52.1	15.7716	16.21	0.549259	0.496949	5.44028				198	24	16.0593	16.21	0.627724	0.549259	3.21709				227	72.3	12.6042	14.3	1.2994	0.990796		8.23498					160	25	12.7637			13.33			0.366173	0.287707	5.59721
	188	25	16.8963	16.93	0.470793	0.366173	7.74194				199	43.7	14.83	15.39	0.836966	0.784656	4.89102				228	53.2	12.0682	13.65	0.487277	0.438549		5.97726					161	43.6	10.8806			12.57			0.418483	0.340017	5.51874
	189	21.9	16.8178	16.83	0.549259	0.523104	4.23714				200	73.5	14.2546	15.38	0.967742	0.784656	2.85092				229	34.2	13.4488	14.16	0.682187	0.63346		3.47591					162	26	10.1221			11.27			0.313862	0.209241	3.81866
	190	58.9	15.6146	16.12	0.732345	0.680035	6.69573				201	88.8	13.9669	15.24				1.46469	1.41238		230	48.2	11.7759	13.33	0.730915	0.69843		3.54088					163	26.6	11.299			12.2			0.313862	0.287707	1.54316
	191	78.2	16.5824	16.83	0.889276	0.680035	7.21883				202	58.5	15.0131	15.71	0.836966	0.65388	4.31561				231	83.1	10.7201	13.22	0.844613					1.13698	0.860855		164	29.5	12.3191			13.12			0.366173	0.287707	7.19268
	192	63.8	15.3269	15.95	0.549259	0.392328	7.50654				203	39.3	14.5161	15.09	0.967742	0.784656	3.42633				232	39.7	13.3839	14.24	0.747158	0.519762		9.84299					165	86.2	8.91892			12.82						0.941587	0.810811
	193	37.2	16.4516	16.64	0.523104	0.418483	13.6792				204	66.7	13.8361	15	0.863121	0.732345	4.39407				233	72.7	12.1494	14.02	1.10449	1.05577		5.29507					167	82.4	10.959			13.36			0.967742			1.43854	1.07236
	193a	17	16.19	16.25	0.523104	0.392328	8.39582				205	41.6	14.1761	14.9	0.967742	0.732345	7.34961				234	48.3	13.4651	14.5	0.552247	0.536004		6.7569					168	26.2	12.1622			12.87			0.418483	0.287707	7.66347
	194	38.2	17.524	17.44	0.65388	0.601569	7.34961				206	78	14.6207	15.59	0.889276	0.732345	3.42633				235	86.2	12.588	14.38	1.07201					1.77044	1.60801		169	64.9	9.18047			12.19			0.340017	0.313862	5.10026
	195	89.7	17.5763	17.45	0.209241			1.33391	1.17698		213	36.6	15.2746	15.67	0.732345	0.627724	3.66173				236	26.1	13.0915	13.63	0.341094	0.324851		3.10233					170	37.9	11.9006			13.09			0.418483	0.261552	6.48649
	196	67.1	16.687	16.88	1.15083	1.02005	7.97733				214	62	13.653	14.88	0.993897	0.863121	2.38012				237	77.1	11.8408	13.87	1.2994	0.974553		7.32539					171	39.6	11.7437			13.04			0.549259	0.444638	3.89712
	197	12.8	17.027	17.01	0.549259	0.470793	8.02964				215	21.4	14.5423	14.74	0.549259	0.496949	5.80645				238	22.1	14.1798	14.47	0.552247	0.487277		7.60152					172	51	11.456			13.18			0.496949	0.313862	6.27724
	198	66.3	15.1177	15.84	0.496949	0.340017	6.87881				216	32.9	15.9547	16.2	0.470793	0.366173	3.34786				239	82.4	11.0774	13.44						1.12074			173	82.3	8.55275			12.68						1.09852
	199	83.4	15.75	16.34	0.313862			0.732345	0.680035		217	51.7	14.4377	15.22	1.04621	0.601569	9.59895				240	40.6	13.0103	13.99	0.649702	0.617217		5.63617					174	75.7	11.7698			13.81			0.627724	0.575414	3.13862
	200	15	17.2886	17.3	0.444638	0.366173	9.23278				218	28.4	14.7515	15.13	0.627724	0.549259	3.47864				241	15.8	13.7412	13.93	0.519762	0.503519		4.97022					175	46	10.1744			12.17			0.70619	0.418483	6.56495
	201	86.2	16.14	16.53	0.287707			0.784656	0.627724		207	39.6	14.5423	15.09	0.444638	0.340017	6.90497				242	35.2	13.6925	14.37	0.714672	0.600975		6.65945					176	45.9	9.25894			11.57			0.601569	0.444638	5.93723
	202	65.6	15.2223	15.9	0.575414	0.470793	7.27114				208	79.3	13.6007	14.97	0.680035	0.444638	9.3374				243	45.5	13.3839	14.38	0.69843	0.63346		4.07688					177	48.7	10.1744			12.26			0.470793	0.366173	8.29119
	203	59.9	16.1639	16.53	0.863121	0.680035	7.63731				209	69.8	14.2023	15.29	1.33391	0.915432	6.17262				244	70.1	11.4997	13.59	1.03952	0.925826		4.95398					178	83.7	9.72973			12.78						0.863121	0.836966
	204	42.8	15.5885	15.98	0.496949	0.366173	7.585				210	34.8	15.51	15.81	0.392328	0.313862	5.0218				245	23.4	12.3119	12.89	0.568489	0.519762		2.58257					179	14.1	11.796			12.09			0.392328	0.340017	4.62947
	204a	49.2	16.3208	16.55	0.915432	0.784656	7.53269				211	48.7	13.8361	14.74	0.575414	0.444638	4.83871				246	45.6	12.8479	14	0.471034	0.454792		4.8078					180	23.3	12.5022			13.05			0.680035	0.496949	5.15257
	205	10.9	14.9085	14.96	0.418483	0.313862	8.0558				212	33.2	15.6408	15.87	0.680035	0.496949	9.10201				247	67.7	12.5068	14.19	0.909583	0.893341		4.353					181	12.2	12.0314			12.25			0.470793	0.392328	4.52485
	206	86.8	15.1439	15.92	0.392328			1.12467	0.993897		219	53.5	14.2546	15.17	1.2816	0.993897	5.62337				248	76.9	10.8338	13.24	0.909583	0.730915		4.82404					182	82.6	9.44202			12.73						1.25545	1.17698
	207	39.8	16.0854	16.33	0.784656	0.549259	7.00959				220	44.3	15.6931	16.07	0.65388	0.575414	1.77855				249												183	49.5	10.6713			12.62			0.627724	0.575414	2.77245
	207a	9.2	16.3731	16.41	0.418483	0.340017	10.1744				221	19.6	15.0654	15.26	0.575414	0.496949	6.51264				250	6.4	13.53	13.57	0.389821	0.373579		8.33243					184	24.4	12.6853			13.24			0.340017	0.287707	5.85876
	208	80.5	16.6609	16.9	0.392328			0.836966			222	84.3	13.9407	15.18				1.07236			251	31.1	12.3281	13.18	0.617217	0.536004		6.3346					185	38.9	11.6129			12.92			0.444638	0.340017	7.48038
	209a	87.8	16.3993	16.72	0.366173			1.12467	0.889276		223	52.4	14.333	15.16	0.680035	0.549259	6.64342				252	79	13.189	14.72	1.18571	0.747158		7.76394					186	51.2	11.4821			13.2			0.575414	0.287707	4.89102
	209b	12.3	15.7193	15.75	0.366173	0.340017	6.19878				224	38.8	14.2023	14.85	0.444638	0.287707	6.98344				253	52.6	12.4905	13.92	0.665945	0.600975		5.92853					187	68.2	8.78814			12.26			0.732345	0.627724	3.16478
	210	55.5	15.9285	16.3	0.863121	0.680035	6.59111				225	64.8	14.15	15.18	0.810811	0.732345	2.69398				254	64.7	11.7759	13.68	0.925826	0.63346		7.27666					188	86.1	10.3051			12.97			0.470793			1.12467	0.915432
	211	56.2	16.3731	16.65	0.70619	0.523104	8.3435				226	30.1	14.6207	14.99	0.65388	0.496949	8.76199				255	15.1	13.8711	14.04	0.389821	0.373579		6.88684					189	32.5	10.9852			12.21			0.549259	0.470793	5.15257
	212	44.5	14.5161	15.18	0.470793	0.261552	9.20663				227	63.1	14.6992	15.55	1.20314	0.889276	4.0279				256	40.7	12.8641	13.88	0.487277	0.454792		3.23227					190	50.2	10.959			12.83			0.392328	0.287707	5.70183
	213	66.5	15.6931	16.23	0.732345	0.418483	8.86661				228a	62.1	12.3191	13.98	0.863121	0.732345	9.23278				257	87.7	12.0357	14.04	0.584732					1.2994	1.20195		191	61.2	9.91282			12.43			0.784656	0.549259	7.00959
	214	52.5	17.3409	17.28	0.967742	0.889276	6.04185				228b	52.9	14.5946	15.37	0.65388	0.496949	3.00785				258	67.3	11.6622	13.65	0.860855	0.82837		3.26475					192	85.7	9.67219			12.83						0.810811
	215	46.7	16.8439	16.9	0.680035	0.392328	9.18047				229	25.6	15.51	15.69	0.601569	0.366173	7.97733				259	74	12.0845	13.99	0.617217	0.568489		4.27179					194	64	10.0697			12.59			0.575414	0.418483	4.65562
	216	77.4	15.9547	16.46	0.7585	0.496949	5.72799				230	77.5	14.15	15.27	1.2816	0.70619	9.65126				260	89.4	10.5577	13.14	0.568489					1.44559	1.28316		195	57.2	10.8021			12.91			0.65388	0.523104	5.10026
	217	43.6	15.5885	15.98	0.967742	0.889276	3.29555				231	49.5	15.9285	16.26	0.836966	0.496949	11.7437				260b	53.3	12.8316	14.16	1.15322	0.747158		8.55983					196	32.7	12.633			13.47			0.392328	0.261552	5.36181
	218a	61.8	15.7454	16.2	0.836966	0.549259	6.46033				232	45.3	15.3269	15.78	0.810811	0.601569	3.71404				261	79.6	13.1565	14.7	0.958311	0.795885		6.04223					197	9.3	13.3391			13.42			0.340017	0.287707	4.70793
	218b	8.6	16.0854	16.12	0.470793	0.418483	6.95728				233	29.8	16.5039	16.6	0.549259	0.496949	7.79425				262	37	12.5555	13.55	0.860855	0.747158		4.62913					199	56.6	9.83435			12.27			0.470793	0.235397	6.32956
	218c	27.9	14.6207	14.95	0.496949	0.470793	6.46033				234	23.3	15.2746	15.49	0.70619	0.601569	8.18657				263	39.2	12.2469	13.39	0.471034	0.341094		6.91933					200	66.2	9.18047			12.23			0.392328	0.235397	4.62947
	218d	55.9	15.5623	16.09	0.889276	0.65388	4.94333				235	77.6	14.7254	15.65	0.836966	0.70619	3.45248				263b	38.4	13.4164	14.24	0.600975	0.584732		7.14672					201	43.6	11.8745			13.26			0.732345	0.627724	6.87881
	219a	29.3	15.9808	16.17	0.470793	0.340017	8.89276				236	73.3	15.0392	15.82	0.967742	0.7585	11.1944				264	45.6	12.3443	13.64	0.600975	0.568489		5.42501					202	52.4	10.1482			12.36			0.523104	0.418483	5.46643
	219b	40.1	16.8963	16.97	0.810811	0.65388	7.68963				237	28.2	15.7454	15.9	0.65388	0.523104	12.8971				265	28	14.3097	14.71	0.617217	0.536004		4.20682					203	25.4	12.973			13.51			0.601569	0.444638	7.84656
	220	43.3	14.6992	15.3	0.523104	0.392328	5.88492				238	77.5	14.6992	15.65	0.810811	0.70619	3.74019				266	29.8	13.059	13.72	0.454792	0.389821		6.74066					203b	19.4	12.7114			13.1			0.523104	0.366173	4.44638
	220a	58.5	14.9608	15.71	1.04621	0.967742	4.10636				239	49	15.0131	15.6	0.810811	0.680035	4.89102				267	11.6	12.7017	12.86	0.422306	0.389821		3.62209					204	42	11.9268			13.25			0.836966	0.575414	4.34176
	220b	63.2	15.9547	16.41	1.04621	0.993897	7.40192				240	75.8	12.7114	14.39	0.575414	0.418483	8.02964				268	82.2	11.4348	13.65	1.05577								205	48.5	11.1421			12.9			0.70619	0.65388	2.35397
	221	51.9	16.1116	16.42	0.993897	0.889276	5.17873				241	61	14.0976	15.14	0.810811	0.70619	3.11247				269	78.6	9.90796	12.69	0.974553	0.649702		4.92149					206	51.6	10.7236			12.71			0.680035	0.627724	3.40017
	222	83.2	15.7977	16.34	0.444638			0.967742			242	71.2	13.9146	15.11	0.784656	0.627724	2.61552				270	38.3	13.0428	13.95	0.600975	0.519762		6.88684					207	52.9	10.5929			12.66			0.470793	0.313862	6.068
	223	15.7	16.1378	16.15	0.470793	0.340017	7.14037				243	12.4	14.83	14.88	0.418483	0.261552	10.5667				271	33.9	12.7666	13.62	0.747158	0.714672		7.08175					208	33.6	11.8483			12.9			0.444638	0.340017	4.7864
	224	86.7	15.8239	16.35	0.470793			1.15083	1.04621		244	55.7	14.7515	15.54	0.889276	0.7585	4.70793				272	21.9	13.7087	14.05	0.536004	0.487277		5.96102					209	67	10.4098			12.86			0.836966	0.549259	6.93112
	225	28.5	16.0331	16.16	0.470793	0.261552	6.72188				245	85.6	14.9608	15.85				1.09852	0.993897		273	77.5	11.4348	13.62	0.860855	0.682187		5.70114					210	56.8	10.5667			12.75			0.680035	0.496949	5.80645
	226	27.4	15.9808	16.15	0.549259	0.470793	8.89276				246	17.8	14.5161	14.68	0.418483	0.287707	7.55885				274	33.3	13.4164	14.11	0.649702	0.617217		5.2301					211	47.5	11.5867			13.17			0.575414	0.418483	7.32345
	227	78.8	15.7454	16.27	0.7585	0.65388	6.90497				247	62	15.85	16.34	0.967742	0.627724	9.10201				275	72.4	13.2702	14.72	1.36437	1.18571		3.63833					212	29	10.9067			12			0.444638	0.287707	5.75414
	227a	83.1	14.3069	15.42	0.366173			0.732345			248	41.8	13.7315	14.53	1.09852	0.863121	10.8282				276	51.2	12.458	13.87	0.958311	0.844613		5.66865					213	27.2	13.7315			14.2			0.444638	0.287707	6.3034
	228	83.1	17.0532	17.14	0.392328			1.36007			249	89.3	13.4176	14.88				1.12467	1.02005		277	30.6	13.8062	14.35	0.471034	0.454792		3.68706					214	75.1	10.1221			12.79			0.7585	0.549259	4.57716
	229	85	16.7393	16.9	0.287707			1.30776	1.15083		250	60	14.83	15.59	0.549259	0.418483	6.93112				278	58.4	11.4997	13.39	0.649702	0.568489		6.72442					215	59.2	11.116			13.16			0.810811	0.627724	4.7864
	230a	54.6	16.1116	16.43	0.732345	0.627724	8.50044				251	54.9	13.9407	14.92	0.732345	0.575414	5.62337				279	30.2	13.9686	14.47	0.617217	0.600975		3.78452					216	75.5	10.0697			12.76			0.7585	0.575414	3.00785
	230b	66.3	15.5623	16.16	0.810811	0.523104	6.22493				252	29.2	13.9669	14.48	0.523104	0.470793	6.46033				280												217	22.6	12.5545			13.07			0.575414	0.523104	5.75414
	231	5.1	15.8762	15.91	0.340017	0.261552	4.94333				253	79.4	15.667	16.27	0.7585	0.65388	4.18483				280b	76.6	10.98	13.33	0.7634	0.568489		6.69193					218	69.7	10.5929			13.01			0.732345	0.601569	4.551
	231a	36	16.347	16.47	0.549259	0.470793	8.84045				254	32.9	15.0131	15.37	0.65388	0.523104	4.62947				281	49.2	13.5463	14.58	0.730915	0.69843		4.64537					219	58.2	10.1221			12.5			0.941587	0.7585	3.71404
	232	43.1	14.333	15	0.784656	0.601569	6.43418				255	84.1	14.7777	15.73				1.20314			282												220	46	12.6591			13.88			0.836966	0.7585	2.45859
	233	79.5	15.1962	15.97	0.810811	0.7585	5.15257				256	55.7	14.1238	15.07	1.04621	0.967742	1.64778				283	67.8	13.4488	14.79	1.31565	1.26692		4.09312					221	78.6	10.8544			13.27			0.7585	0.549259	3.53095
	234	22.5	15.7454	15.84	0.601569	0.340017	13.4176				257	57.9	13.993	15.03	0.863121	0.65388	13.993				284	42.4	13.9036	14.69	0.536004	0.357336		10.3952					222	33.1	11.9791			12.98			0.444638	0.366173	6.61726
	235	51	16.0593	16.41	0.496949	0.418483	4.99564				258	38.3	12.816	13.77	0.470793	0.261552	9.99128				285	80.2	11.922	13.94						1.18571			222a	17.6	11.9268			12.34			0.549259	0.366173	7.27114
	236	50.8	15.7716	16.2	0.549259	0.470793	6.14647				259	45.2	15.4839	15.93	0.549259	0.418483	4.2633				286	65.6	13.66	14.9	1.03952	0.82837		6.25338					223	63.2	9.20663			12.13			0.863121	0.575414	4.49869
	237a	58.8	16.007	16.39	0.575414	0.496949	5.0218				260	77.2	14.5946	15.58	0.627724	0.575414	2.06626				287	14.6	13.5138	13.69	0.568489	0.552247		7.13048					224	62.3	10.5144			12.83			0.680035	0.549259	4.7864
	237b	43.1	16.3993	16.59	0.70619	0.496949	9.72973				261	66.1	15.17	15.9	1.09852	0.941587	2.56321				288	59	10.8175	12.96	0.877098	0.487277		7.97509					225	80.3	9.25109			12.66						1.07236
	238	86.6	15.85	16.41	0.261552			0.680035	0.575414		262	62.5	15.2223	15.88	0.575414	0.392328	6.95728				289	34.6	14.9919	15.39	0.7634	0.600975		10.2491					226	53.4	10.7498			12.78			1.04621	0.70619	6.85266
	238b	84.7	16.8963	17.02	0.313862			1.20314	0.915432		263	77.6	14.1238	15.28	0.7585	0.680035	3.2694				290	55	12.3443	13.87	1.12074	0.779643		8.70601					227	20.4	12.7376			13.15			0.496949	0.444638	3.37402
	239a	57	16.1639	16.51	0.836966	0.575414	10.0959				264	37.4	15.9285	16.16	0.810811	0.549259	4.10636				291	26.1	12.8316	13.42	0.438549	0.373579		8.6248					228	59.1	10.2267			12.58			0.784656	0.496949	6.93112
	239b	71.8	16.9224	17.01	0.889276	0.732345	6.87881				265	59.4	14.0192	15.05	0.601569	0.313862	9.44202				292	69.4	12.3119	14.09	0.974553	0.860855		5.44126					229	49.5	9.72973			12			0.601569	0.470793	7.74194
	240	22.7	15.6146	15.75	0.340017	0.287707	7.74194				266a	54.4	14.4377	15.25	1.09852	1.02005	1.38622				293	63.5	11.8083	13.68	0.925826	0.779643		4.6941					230	58.7	11.3514			13.3			0.627724	0.470793	4.91718
	241	33.3	16.3208	16.45	0.65388	0.470793	8.91892				266b	77.7	14.0453	15.21	0.863121	0.575414	3.63557				294	51.2	11.9383	13.51	0.714672	0.487277		8.36492					231	59.5	10.8282			12.98			1.17698	1.07236	6.77419
	242	41.5	14.4115	15.05	0.601569	0.523104	6.80035				267	51.7	15.1439	15.71	1.04621	0.70619	10.5929				295	24.4	13.0428	13.54	0.536004	0.519762		5.10016					233	28.9	13.0514			13.69			0.444638	0.366173	5.33566
	243a	42.4	16.9224	16.97	0.680035	0.496949	9.99128				268	33.6	14.9085	15.3	0.523104	0.418483	6.90497				296	51	12.2794	13.74	0.584732	0.536004		6.38332					234	76	7.76809			12.42			0.732345	0.575414	2.53705
	243b	76.4	16.4255	16.7	0.70619	0.627724	4.83871				269	76.8	14.4638	15.52	0.810811	0.627724	6.77419				297	88.4	11.7434	13.86	0.909583					1.67298	1.28316		235	85.6	10.0253			12.83						0.993897
	243c	12.7	15.2746	15.36	0.340017	0.183086	7.08806				270	23.6	16.9747	17.02	0.65388	0.549259	1.83086				298	42.9	12.8803	13.96	0.600975	0.503519		5.89605					236	67.4	8.65737			12.23			0.470793	0.340017	5.80645
	243d	70.9	17.4194	17.33	0.915432	0.65388	9.99128				271	58.8	15.7977	16.25	0.784656	0.627724	4.36792				299	26.6	12.0845	12.82	0.584732	0.536004		3.78452					237	67.7	10.1482			12.7			0.470793	0.366173	5.12642
	244	59.9	15.5362	16.06	0.575414	0.470793	9.96513				272	70.5	14.4377	15.42	0.732345	0.601569	5.17873				300	56.7	13.0915	14.4	1.07201	0.893341		8.52734					238	50.8	10.5144			12.55			0.549259	0.418483	6.87881
	244a	24.6	15.8762	16.04	0.627724	0.496949	5.75414				273	78.5	14.8561	15.78	1.07236	0.732345	10.2267				301	31.5	12.1169	13.03	0.600975	0.487277		7.00054					239	23.9	12.3976			12.98			0.496949	0.418483	8.29119
	245	27.4	16.2947	16.41	0.523104	0.470793	9.25894				274	42.6	15.1439	15.59	0.680035	0.627724	1.83086				302	62.2	12.0845	13.84	0.471034	0.422306		6.80563					240	21.7	11.5606			12.2			0.496949	0.340017	8.91892
	246	55.3	15.51	16.02	0.680035	0.340017	7.16652				275	54.3	14.2807	15.18	0.863121	0.601569	6.66957				303	32.2	12.6042	13.43	0.617217	0.600975		3.18354					240b	66.7	9.70357			12.41			0.444638	0.366173	5.57105
	246a	8.7	15.8239	15.82	0.444638	0.392328	7.0619				276	47.3	14.7777	15.44	0.680035	0.627724	1.70009				303b	34.1	11.3373	12.54	0.536004	0.406064		7.39036					240c	40.7	10.2005			12			0.392328	0.313862	5.57105
	247a	83.7	16.2947	16.65	0.7585			1.02005			277	41.3	12.9991	14	0.65388	0.523104	5.41412				304	14.2	14.0661	14.21	0.552247	0.389821		7.56903					241	39.1	12.0575			13.25			0.496949	0.444638	6.69573
	247b	72.5	16.2162	16.57	0.444638	0.340017	5.17873				278	55	15.85	16.3	1.25545	0.967742	6.61726				305	58.8	11.8246	13.6	0.747158	0.730915		4.12561					242	66.3	10.5144			12.91			0.732345	0.601569	4.2633
	248	32.2	16.5039	16.61	0.784656	0.444638	11.0375				279	8.2	15.5362	15.52	0.444638	0.366173	11.0898				306	24.6	10.4927	11.48	0.649702	0.519762		4.95398					243	44.4	10.9329			12.63			0.863121	0.732345	3.60942
	249	72.4	15.6931	16.25	0.784656	0.601569	6.61726				280	85.3	14.4638	15.55				0.7585			307	26.3	13.8874	14.31	0.503519	0.357336		8.70601					244	61.2	10.0959			12.55			0.70619	0.601569	4.10636
	250	33.7	16.7655	16.87	0.7585	0.601569	5.67568				281a	79.9	13.3391	14.79	0.784656	0.627724	8.08195				307b	53.9	12.8154	14.17	0.568489	0.503519		1.94911					246	52.8	9.5728			12			0.863121	0.680035	4.15867
	251	16	16.6085	16.63	0.601569	0.418483	10.8806				281b	47.5	14.9085	15.51	1.12467	0.7585	9.18047				308	72.2	11.8733	13.84	1.25068	1.18571		2.92366					247	57.3	10.5667			12.76			0.65388	0.444638	7.40192
	251a	37.9	15.0392	15.45	0.575414	0.418483	11.1421				281c	52	14.9346	15.57	0.810811	0.680035	5.25719				309	51.9	12.4093	13.85	0.909583	0.779643		7.78018					249	89.8	9.38971			12.94						0.863121	0.836966
	252	30.8	16.3993	16.52	0.523104	0.444638	8.29119				282	70.5	14.8038	15.67	1.02005	0.915432	4.21099				310	72.6	12.523	14.25	1.44559	1.00704		8.18625					250	59.4	10.0436			12.47			0.889276	0.7585	4.73409
	253	40.5	15.0392	15.49	0.732345	0.680035	6.95728				283	64.8									311	70.6	11.8571	13.82	1.51056	1.42934		3.89821					251	81.3	8.99738			12.68						1.04621	0.941587
	253a	44.7	16.2947	16.52	0.732345	0.366173	11.5606				283a	47	14.6992	15.36	0.836966	0.70619	8.16042				312	67.9	11.987	13.86	1.28316	0.990796		7.35788					252	58	7.89887			11.83			0.836966	0.575414	4.99564
	254	72.6	15.3008	16	1.04621	0.444638	10.7759				283b	64.2	14.4638	15.43	0.941587	0.810811	2.90323				313	36.9	12.588	13.57	0.503519	0.438549		3.88197					253	52.2	10.3313			12.47			0.680035	0.575414	3.37402
	255	51.5	15.9808	16.34	1.02005	0.941587	6.80035				284	81.6	14.9085	15.79				1.22929			314	39.3	13.124	14.04	0.552247	0.406064		7.16297					254	29.4	11.7175			12.64			0.444638	0.418483	2.32781
	255a	41.7	13.9669	14.75	0.366173	0.340017	6.80035				285	72.6	14.8561	15.75	0.7585	0.65388	8.89276				315	82.1	12.1657	14.11						1.12074			255	33.3	11.5606			12.68			0.470793	0.444638	3.55711
	256	22	15.6146	15.74	0.366173	0.340017	3.53095				286	65.9	13.6792	14.93	0.810811	0.680035	3.19093				316	59.9	12.3606	13.98	1.02328	0.844613		4.22306					256	83.8	10.4621			13.06			0.65388			1.09852	1.04621
	257	41.2	14.6731	15.27	0.836966	0.732345	8.99738				287	54.7	15.1962	15.81	0.523104	0.340017	3.63557				317	68.7	12.0845	13.93	0.259881	0.211153		2.32269					258	37.6	11.9791			13.14			0.7585	0.627724	2.2755
	258a	41.7	15.6408	15.96	0.941587	0.732345	7.71578				288	67.6	14.2023	15.27	1.07236	0.810811	10.4621				318	71	11.8896	13.84	0.682187	0.665945		2.97239					259	46	9.96513			12.04			0.65388	0.601569	5.04795
	258b	41.4	14.9608	15.5	0.65388	0.549259	6.01569				289	40.5	15.4316	15.8	0.470793	0.418483	3.76635				319	74.5	10.444	12.98	0.730915	0.373579		7.53655					260	39.2	10.959			12.46			0.549259	0.418483	5.85876
	258c	43.1	17.6286	17.51	0.549259	0.470793	11.4298				290	55.8	15.51	16.03	0.680035	0.366173	11.0375				320	38.1	12.6854	13.68	0.438549	0.357336		5.71738					261	47.4	10.8544			12.67			0.523104	0.470793	4.60331
	259	65.2	15.9285	16.35	0.523104	0.496949	9.88666				291	47.3	14.8823	15.51	0.65388	0.575414	5.41412																262	40.6	11.9006			13.18			0.784656	0.627724	4.60331
	260	51.5	15.5362	15.99	0.732345	0.496949	8.60506				292	47.9	15.2485	15.74	0.810811	0.70619	6.85266																263	29.1	12.8945			13.57			0.627724	0.418483	2.90323
	261a	69.5	16.6085	16.82	0.836966	0.418483	13.6269				293	79.9	13.7838	15.1	0.863121	0.601569	10.0436																264	24.2	12.3191			12.93			0.523104	0.392328	8.76199
	261b	77	16.007	16.46	0.680035	0.575414	6.87881				294	68.6	14.2807	15.34	1.07236	0.941587	1.83086																265	44.6	10.9852			12.67			0.680035	0.575414	2.35397
	261c	46.5	16.2162	16.46	0.549259	0.366173	7.95118				295	34.7	15.4577	15.81	0.496949	0.418483	2.56321																266	37.8	11.4821			12.79			0.601569	0.287707	7.21883
	262	57.7	17.2886	17.27	0.7585	0.523104	6.5388				296	88.5	14.2807	15.43				1.15083	1.07236														267	65.5	8.78814			12.18			0.836966	0.627724	2.40628
	262a	32.5	15.7977	16.03	0.418483	0.366173	7.87271				297	27.9	14.5423	14.87	0.496949	0.366173	8.89276																268	34.3	10.9852			12.29			0.575414	0.444638	5.15257
	263	46.7	17.1578	17.2	0.941587	0.627724	10.4359				298	18.6	15.7454	15.8	0.65388	0.496949	7.40192																269	50.5	11.796			13.4			0.810811	0.627724	2.87707
	264	29.5	15.46	15.74	0.575414	0.261552	8.52659				299	62.1	14.6992	15.54	0.836966	0.627724	9.12816																270	87.6	9.49433			12.88			0.470793			1.12467	1.12467
	264a	55.3	14.49	15.33	0.313862	0.261552	4.83871				300	36.2	15.8762	16.15	0.575414	0.523104	7.89887																271	24.1	12.3452			12.94			0.70619	0.444638	4.05405
	265	58.4	16.2947	16.59	0.549259	0.418483	5.25719				301	48.9	15.3008	15.82	0.784656	0.627724	4.62947																272	56.7	11.6652			13.46			0.889276	0.627724	7.42807
	266	84.8	15.2746	16.04	0.444638			0.967742	0.967742		302	75.8	14.0976	15.27	0.889276	0.680035	8.52659																274	30.3	12.0052			12.9			0.70619	0.575414	4.44638
	267a	75.2	15.5362	16.14	0.889276	0.65388	8.18657				303	62.2	13.2084	14.56	0.863121	0.784656	2.06626																275	12.2	12.7899			12.96			0.470793	0.418483	1.88317
	267b	82.2	16.3208	16.65	0.627724			0.889276			304	77.3	13.6792	15.02	0.836966	0.601569	5.91107																276	74.7	9.88666			12.64			0.575414	0.470793	1.46469
	268	48.2	16.4778	16.69	0.810811	0.601569	7.63731				305	86.3	14.1238	15.3				1.07236	1.07236														277	36.7	11.0113			12.41			0.70619	0.65388	2.19704
	269	49.6	15.0131	15.61	0.65388	0.549259	5.20488				306a	70.4	14.333	15.36	0.889276	0.470793	10.3051																278	28.8	12.1883			12.99			0.549259	0.444638	6.19878
	270	80.4	16.1639	16.59	0.732345			1.46469	1.09852		306b	43.2	15.0915	15.6	0.575414	0.470793	5.0218																280	87.9	9.62511			12.89						0.889276	0.863121
	271	52.1	15.4316	15.92	0.575414	0.444638	8.5789				307a	61.4	15.6146	16.13	1.07236	0.941587	3.84481																281	69.5	10.9067			13.21			0.810811	0.732345	5.93723
	272	86.6	15.4054	16.1	0.549259			1.30776	1.07236		307b	83.8																					282	16.6	11.9529			12.33			0.444638	0.340017	4.62947
	273	80	16.1901	16.59	0.523104			0.627724			308	11.9	15.7716	15.84	0.496949	0.287707	5.0218																283	71.6	9.25894			12.41			0.575414	0.392328	5.28335
	274	47	15.67	16.09	0.732345	0.313862	8.26504				309	40.1	13.9407	14.64	0.993897	0.889276	1.72624																285	77.1	9.59895			12.59			0.810811	0.70619	2.90323
	275	44	15.3008	15.76	0.627724	0.418483	7.8204				310	73	14.3069	15.37	0.863121	0.7585	4.13252																286	67.5	9.44202			12.29			0.444638	0.392328	2.56321
	276	60.1	15.4577	16.06	0.523104	0.261552	6.04185				311	82.3	13.6269	14.99				0.810811															287	24.3	12.633			13.19			0.392328	0.340017	4.99564
	277	57.3	16.3731	16.65	1.17698	0.993897	6.27724				312	25.7	15.0915	15.34	0.680035	0.575414	4.28945																288	30.7	12.7637			13.51			0.470793	0.366173	5.59721
	278	46.5	14.7254	15.35	0.7585	0.418483	10.5144				313	61.9	14.3592	15.34	0.889276	0.863121	2.56321																289	61.7	9.91282			12.44			0.523104	0.470793	4.57716
	279	88.8	15.4839	16.16	0.366173			0.967742			314	54.4	13.3915	14.57	0.7585	0.575414	5.49259																290	31.3	9.86051			11.35			0.732345	0.549259	4.99564
	280	58.5	14.7777	15.57	0.523104	0.366173	8.76199				315	35.1	15.5362	15.81	0.65388	0.470793	7.19268																291	79.6	7.74194			12.53			0.575414	0.496949	5.3095
	281	55.4	15.17	15.82	0.863121	0.575414	11.4298				316	83.8	13.4961	14.93				1.09852															292	47.8	12.5022			13.81			0.392328	0.340017	5.59721
	282	61.1	15.5885	16.13	1.04621	0.993897	7.08806				317	36.8	14.6207	15.12	0.65388	0.601569	3.2694																293	40.8	11.4298			12.85			0.575414	0.418483	3.71404
	283	63.6	17.3147	17.27	0.784656	0.549259	10.2005				318	55.5	13.6792	14.79	0.836966	0.680035	6.32956																294	66.5	9.86051			12.5			0.810811	0.680035	3.97559
	284	70.8	16.7655	16.95	0.993897	0.65388	7.74194				319	65.8	12.7899	14.35	1.04621	0.915432	4.18483																295	72.4	9.54664			12.45			0.993897	0.810811	6.09416
	285	25.4	15.0654	15.34	0.392328	0.313862	9.28509				320	55.7	14.1238	15.07	0.784656	0.627724	8.52659																297	58.1	9.28509			11.96			0.575414	0.523104	3.55711
	286	48.3	15.8762	16.25	1.02005	0.810811	7.32345				321a	48.9	14.15	14.96	1.15083	1.02005	2.38012																298	69.3	10.7759			13.12			1.09852	0.915432	5.0218
	287	89.7	16.9747	17.08	0.209241			0.680035			321b	44.2	14.0976	14.88	0.680035	0.601569	4.13252																299	0.7	13.5484			13.55			0.392328	0.340017	3.06016
	288	7.6	16.0854	16.11	0.366173	0.340017	7.34961				323	74.8	13.0776	14.63	1.22929	1.07236	3.34786																300	42.2	10.4621			12.23			0.784656	0.680035	2.66783
	289	15.6	16.8178	16.82	0.549259	0.470793	8.68352				323a	42	13.7838	14.61	0.680035	0.575414	8.21273																301	40.7	13.8884			14.65			0.627724	0.418483	2.77245
	290	56.6	17.6024	17.48	0.863121	0.549259	11.3252				323b	88	13.2868	14.81				0.941587	0.496949														302	76.2	9.52049			12.56			0.680035	0.601569	3.87097
	291	63.3	15.9808	16.41	0.941587	0.680035	6.69573				323c	71.7	13.8361	15.05	0.627724	0.444638	4.00174																303	10.6	12.7637			12.89			0.470793	0.418483	4.551
	292	10.5	17.524	17.49	0.392328	0.287707	13.9669				324	56.7	13.7315	14.81	0.7585	0.601569	9.04969																304	48.5	11.0113			12.81			0.70619	0.496949	8.44813
	292a	58.6	16.6609	16.86	0.496949	0.392328	5.88492				325	62.7	13.6269	14.83	0.784656	0.444638	10.279																305	45	10.619			12.44			0.7585	0.523104	7.585
	293a	76.4	16.6347	16.83	0.863121	0.70619	4.23714				326	60.2	15.2223	15.86	0.836966	0.575414	8.70968																306	51.5	10.2267			12.38			0.889276	0.810811	3.60942
	293b	13	15.0915	15.17	0.444638	0.313862	10.0174				327	18.9	16.0854	16.17	0.392328	0.340017	6.04185																308	69.3	11.5344			13.6			0.575414	0.496949	4.23714
	293c	71.1	17.7332	17.52	0.7585	0.523104	6.87881				328	54.2	13.9146	14.91	0.889276	0.784656	1.2816																309	21.2	12.3976			12.88			0.496949	0.366173	5.64952
	294	36	16.5039	16.63	0.601569	0.496949	12.6068				329	74.4	14.0192	15.19	0.915432	0.65388	11.0898																310	56.1	11.2729			13.19			1.02005	0.784656	4.62947
	295	25.3	15.6931	15.87	0.392328	0.209241	14.2807				330	26.2	15.2223	15.44	0.444638	0.366173	2.43243																311	87.1	10.2528			12.95			0.523104			0.889276	0.863121
	296a	88.6	16.3993	16.72	0.209241			0.810811																									312	59.6	11.3514			13.32			0.836966	0.392328	8.63121
	296b	12.7	15.5623	15.65	0.392328	0.366173	6.72188																										313	64.1	11.456			13.47			0.627724	0.444638	9.49433
	297	14.5	18.1517	18.16	0.523104	0.392328	8.55275																										314	52.7	11.4821			13.24			0.967742	0.7585	3.34786
	298	37.6	16.1116	16.32	0.549259	0.392328	6.068																										315	20.7	11.6391			12.22			0.70619	0.575414	7.585
	299	66.1	14.7254	15.58	1.04621	0.889276	5.51874																										316	71.8	9.10201			12.4			1.02005	0.70619	5.46643
	300	21.6	17.9425	17.85	0.549259	0.444638	5.49259																										317	55.4	9.75588			12.19			0.784656	0.601569	2.74629
	301	20.2	15.1962	15.36	0.575414	0.418483	8.00349																										319	38.7	12.2668			13.39			0.7585	0.575414	4.00174
	302	61.5	15.0131	15.74	0.889276	0.601569	9.99128																										320	55.7	10.4882			12.67			0.680035	0.627724	3.97559
	303	34.1	16.7916	16.87	0.418483	0.392328	11.0375																										321	68.7	9.8082			12.51			0.65388	0.523104	3.63557
	303a	64.7	14.4377	15.37	0.549259	0.340017	8.84045																										321b	89.6	10.7498			13.25						0.967742	0.863121
	304	77.5	16.007	16.46	0.444638	0.366173	4.83871																										322	30.6	11.8483			12.79			0.523104	0.418483	5.10026
	305	65.9	16.5301	16.75	0.444638	0.340017	7.79425																										323	55.2	9.3374			11.92			1.07236	0.863121	4.13252
	306	73.7	15.4839	16.13	0.70619	0.287707	12.3976																										324	41.4	11.116			12.65			0.549259	0.496949	3.08631
	307	79.1	15.7977	16.34	0.732345	0.496949	8.47428																										325	85.3	9.36356			12.81						1.17698	0.993897
	308	72.6	15.7193	16.25	0.549259	0.287707	7.63731																										326	54.8	10.0436			12.36			0.863121	0.680035	3.89712
	309	24.1	17.864	17.84	0.65388	0.549259	6.48649																										327	51.3	10.5667			12.6			1.22929	1.02005	4.2633
	310	59	15.6408	16.12	1.09852	0.70619	8.08195																										328	50.7	11.0898			12.93			0.65388	0.496949	5.15257
	311	77.2	15.4316	16.08	0.496949	0.418483	4.73409																										329	34.9	11.0375			12.35			0.70619	0.549259	6.90497
	312	25.8	15.667	15.87	0.523104	0.496949	10.3836																										330	52.4	10.2005			12.39			0.444638	0.392328	4.05405
	313	59	16.007	16.39	1.02005	0.967742	5.59721																										331	62.1	10.8806			13.06			0.601569	0.392328	7.79425
	314	80.9	16.2424	16.59	0.863121			1.12467	1.12467																								332	64.5	10.8806			13.11			0.65388	0.392328	5.17873
	315	38	17.027	17.04	0.836966	0.65388	5.64952																										333	55.2	10.5144			12.67			0.993897	0.810811	6.09416
	316a	42	15.9285	16.2	0.967742	0.836966	5.15257																										335	60	9.67742			12.26			1.25545	0.967742	3.40017
	316b	82.5	15.3531	16.1	0.366173			0.836966																									337	41.4	12.3452			13.53			0.915432	0.601569	7.45423
	316c	76.6	15.3269	16.02	0.863121	0.784656	5.07411																										338	22.8	10.5405			11.43			0.65388	0.496949	5.91107
	316d	9.8	16.3993	16.42	0.418483	0.366173	3.19093																										340	40.7	10.7498			12.37			0.784656	0.627724	6.09416
	317	76.7	16.5824	16.83	0.941587	0.575414	11.0375																										341	85	8.39582			12.76						1.22929	1.15083
	318	77.8	15.6408	16.21	0.627724	0.470793	3.45248																										342	47.4	12.3452			13.69			0.7585	0.575414	4.05405
	319	68.1	15.0131	15.79	0.993897	0.523104	9.93897																										343	45.3	11.116			12.79			0.7585	0.523104	8.18657
	320	79.3	15.6146	16.21	0.444638	0.209241	11.6652																										344	79	9.54664			12.64			1.09852	0.680035	5.93723
	320a	46.7	16.347	16.53	0.680035	0.65388	5.51874																										345	72.4	8.47428			12.37			0.836966	0.65388	6.19878
	320b	18.7	14.7254	14.87	0.444638	0.313862	4.34176																										345b	84.6	9.28509			12.79
	321	80.6	15.667	16.28	0.523104			0.863121																									346	49.8	11.7175			13.33			0.70619	0.496949	3.97559
	322a	59.5	15.9808	16.39	1.02005	0.575414	11.0636																										347	72.9	9.88666			12.62			0.732345	0.549259	4.0279
	322b	32.8	16.2947	16.45	0.575414	0.418483	7.2973																										348	88.2	7.27114			12.8						0.523104
	322c	35.7	14.9608	15.42	0.523104	0.418483	5.80645																										349	32.3	10.2005			11.64			0.575414	0.340017	5.15257
	322d	64.8	16.8178	16.94	0.732345	0.680035	3.76635																										350	79	9.96513			12.73			0.627724	0.418483	5.7803
	323a	56.7	17.4194	17.34	0.993897	0.65388	9.10201																										351	68.2	9.49433			12.32			0.65388	0.523104	4.36792
	323b	34	16.4516	16.62	0.496949	0.313862	7.48038																										352	73.6	9.78204			12.56			0.65388	0.549259	2.79861
	324a	72.3	14.7777	15.68	0.889276	0.836966	4.81255																										353	51.1	9.96513			12.2			0.496949	0.418483	4.62947
	324b	85.6	16.9224	17.02	0.392328			0.70619																									354	39	10.8282			12.36			0.523104	0.418483	1.98779
	324c	16.4	16.0854	16.16	0.444638	0.287707	7.11421																										355	86.2	9.78204			12.85						0.863121	0.810811
	325	78.7	16.5562	16.83	0.836966	0.601569	8.55275																										356	69.2	10.2267			12.78			0.523104	0.444638	4.62947
	326	74.2	16.9747	17.08	1.02005	0.70619	7.53269																										357	44.5	12.0837			13.43			0.549259	0.392328	4.44638
	327	37.1	17.3147	17.28	0.575414	0.549259	7.66347																										358	45	10.8806			12.62			0.732345	0.575414	6.068
	328	57.3	17.027	17.07	1.04621	0.70619	5.41412																										359	79.8	9.86051			12.68			0.915432	0.680035	5.93723
	329	48.3	16.2685	16.54	0.65388	0.470793	6.25109																										360	79.6	8.23888			12.57			0.889276	0.70619	3.94943
	330	74.5	15.4839	16.14	0.889276	0.496949	10.5405																										361	35.1	12.136			13.17			0.601569	0.549259	4.551
	331a	38	15.4054	15.77	0.601569	0.340017	11.3514																										362	16.3	12.0052			12.36			0.470793	0.418483	6.87881
	331b	62.6	16.5301	16.74	0.7585	0.575414	7.00959																										363	64.3	10.0959			12.61			0.523104	0.366173	4.0279
	331c	41.4	16.3993	16.58	0.941587	0.680035	5.20488																										364	21.3	11.7437			12.33			0.496949	0.444638	5.12642
	332	24.5	17.2624	17.29	0.418483	0.340017	14.3854																										365	56.1	11.1421			13.1			0.523104	0.470793	6.27724
	333	79.3	14.9085	15.78	0.601569	0.340017	12.633																										366	23.7	11.5083			12.24			0.601569	0.444638	4.2633
	334	60	16.5039	16.73	0.993897	0.889276	7.34961																										367b	11.6	11.6914			11.91			0.470793	0.366173	4.91718
	334a	59.9	14.9608	15.72	0.496949	0.444638	7.16652																										368	16.5	13.1037			13.36			0.418483	0.366173	4.42023
	335	69.9	16.8439	16.95	0.601569	0.444638	8.0558																										368b	35.4	7.8204			10.77			0.444638	0.313862	3.81866
	336	67.1	15.9547	16.43	1.04621	0.836966	7.32345																										368c	88	9.20663			12.88						1.09852	0.941587
	337	56.3	17.2363	17.2	0.732345	0.549259	8.00349																										369	58.2	11.299			13.25			0.470793	0.418483	5.28335
	338	42.2	17.5763	17.51	0.784656	0.523104	9.36356																										370	86.3	9.21447			12.83						1.09852
	339	84	14.333	15.42	0.418483			1.25545	1.04621																								371	33.9	10.8544			12.18			0.70619	0.549259	5.15257
	340	69.7	14.9346	15.73	0.70619	0.418483	8.18657																										372	51.5	10.7498			12.73			0.575414	0.444638	5.7803
	341	84.2	15.8239	16.34	0.418483			0.993897																									373	27	12.4499			13.13			0.523104	0.392328	4.10636
	342	44.8	15.1177	15.62	0.810811	0.575414	6.74804																										374	58.8	10.4098			12.69			0.993897	0.732345	6.98344
	342a	36.9	16.27	16.47	0.601569	0.575414	7.21883																										375	59.8	10.1482			12.55			1.25545	0.889276	6.95728
	343	86.6	15.3	16.04	0.235397			1.02005	0.915432																								376	42.7	9.93897			11.9			0.810811	0.65388	4.31561
	344	44.4	16.347	16.52	0.993897	0.444638	7.61116																										376b	72.1	10.8806			13.22			0.836966	0.523104	8.08195
	345	41.7	16.2162	16.43	0.863121	0.549259	6.72188																										377	68.8	9.20663			12.32			0.836966	0.549259	6.80035
	346a	64.7	15.0654	15.83	0.575414	0.392328	7.66347																										378	59.8	10.5405			12.8			0.810811	0.627724	4.551
	346b	87.5	16.9486	17.02	0.418483			1.02005																									379	41.7	11.2467			12.76			0.470793	0.392328	2.61552
	347	63.7	15.5362	16.08	0.993897	0.496949	12.6068																										380	60.6	11.3252			13.32			0.810811	0.496949	7.61116
	348	38.9	14.4377	15	0.601569	0.470793	5.36181																										382	63.4	11.1421			13.26			0.496949	0.261552	8.91892
	349	51.7	15.9547	16.34	0.915432	0.496949	5.62337																										382b	68.9	7.14037			12.12			0.601569	0.496949	2.53705
	350	37.5	17.4978	17.45	0.523104	0.470793	5.23104																										383	43.8	11.5083			13.01			0.810811	0.65388	6.51264
	351	35.4	15.51	15.81	0.470793	0.340017	12.3191																										384	55.8	9.46818			12.02			0.523104	0.392328	4.94333
	352	77.3	15.3008	16.02	0.993897	0.7585	6.22493																										385	7.6	12.5283			12.6			0.444638	0.392328	9.15432
	353	28.4	16.7132	16.77	0.470793	0.313862	13.8361																										386	19.2	12.973			13.32			0.575414	0.523104	5.80645
	354	49.4	17.184	17.2	0.836966	0.627724	10.0697																										388	67.2	10.0697			12.65			0.7585	0.601569	3.76635
	355	72.9	16.1639	16.57	1.09852	0.601569	9.20663																										389	61.6	10.9067			13.07			0.627724	0.418483	7.87271
	356a	76.9	15.3269	16.02	0.941587	0.863121	3.92328																										390	12.4	11.9791			12.2			0.470793	0.392328	6.3034
	356b	82.2	15.4577	16.16	0.340017			0.7585																									391	44.7	10.4882			12.34			0.70619	0.65388	2.98169
	357	17	16.6347	16.63	0.470793	0.392328	7.71578																										392	32.6	11.2467			12.41			0.601569	0.549259	3.58326
	358	25.4	16.8701	16.93	0.496949	0.418483	7.63731																										393	65.8	10.3313			12.79			0.967742	0.732345	5.96338
	359	57.2	15.4577	16.04	1.04621	0.863121	5.25719																										394	65	10.0697			12.61			0.496949	0.418483	4.05405
	360	26.1	15.17	15.44	0.601569	0.496949	5.12642																										396	78.2	10.7498			13.21			0.836966	0.627724	2.85092
	361	8.3	14.9085	14.93	0.418483	0.313862	11.3252																										396a	53	10.8806			12.85			0.601569	0.523104	3.97559
	362	63.8	14.83	15.62	0.993897	0.967742	6.74804																										397	21.9	10.5667			11.4			0.470793	0.392328	5.88492
	363	62.2	16.6609	16.87	0.941587	0.732345	6.38187																										398	47.6	10.9329			12.73			0.810811	0.65388	4.89102
	364	65.9	16.3993	16.68	1.15083	0.627724	10.279																										399	74.1	11.0898			13.38			1.17698	0.784656	7.21883
	365	61.7	17.9163	17.68	1.04621	0.444638	11.9006																										400	21.4	13.0776			13.48			0.70619	0.680035	5.98954
	366	31	16.4778	16.6	0.523104	0.470793	9.3374																										401	38.7	12.476			13.54			1.02005	0.915432	4.18483
	367	70.8	15.2485	15.93	0.627724	0.470793	8.08195																										402	73.6	9.62511			12.49			0.784656	0.444638	6.74804
	368	18.1	16.2685	16.35	0.549259	0.261552	11.796																										402a	61.9	9.72973			12.33			1.17698	0.941587	4.81255
	369	89	15.1439	15.92	0.261552			0.863121	0.863121																								403	28.2	11.0113			12.05			0.496949	0.366173	6.27724
	370	72	16.2424	16.57	0.7585	0.470793	7.40192																										405	39.4	10.3051			12.02			0.784656	0.70619	2.92938
	371	85.8	15.7977	16.35	0.470793			1.07236	0.836966																								406	89	9.44202			12.92			0.340017			1.43854	1.12467
	372	63.5	16.4255	16.67	0.70619	0.523104	7.14037																										407	21.4	13.2607			13.64			0.703575	0.313862	9.58065
	373	67.6	14.8038	15.65	0.993897	0.680035	9.12816																										408	60	9.91282			12.4			0.627724	0.575414	2.56321
	374	52.7	15.8239	16.21	0.523104	0.444638	3.45248																										409	30.4	12.7114			13.46			0.523104	0.418483	4.15867
	375	66.4	15.5885	16.16	0.915432	0.549259	10.7236																										410	65.6	10.3313			12.78			1.17698	0.941587	6.61726
	376	44.7	16.5039	16.67	0.784656	0.549259	11.2467																										411	81	9.62511			12.7						1.22929	1.07236
	377	88.3	16.2162	16.59				1.20314	1.12467																								412	4.8	12.7376			12.77			0.418483	0.392328	4.551
	377-2	88.3	16.2162	16.59				1.09852	0.993897																								413	54	10.0174			12.32			0.680035	0.523104	5.86922
	378	58.5	15.1439	15.78	0.496949	0.287707	8.50044																										414	17.2	13.313			13.57			0.575414	0.523104	8.97123
	378a	80.7	16.1639	16.59	0.575414			0.967742																									415	62.4	10.6452			12.92			1.09852	0.915432	4.34176
	379	44.7	16.5562	16.75	0.810811	0.680035	8.5789																										416	70	8.73583			12.32			0.70619	0.65388	2.66783
	380a	55.8	15.7454	16.16	0.627724	0.366173	8.91892																										417	47.6	10.3836			12.37			0.418483	0.340017	5.20488
	380b	58.3	16.6347	16.79	0.810811	0.549259	10.4882																										418	59.6	10.6975			12.89			0.65388	0.549259	4.52485
	380c	27.5	16.7916	16.85	0.523104	0.496949	9.86051																										419	28.9	8.2755			10.35			0.575414	0.470793	8.2755
	380d	71.2	16.9224	17.01	0.836966	0.7585	6.25109																										420	52.9	10.4882			12.59			0.732345	0.601569	5.51874
	380e	53.3	16.3731	16.64	1.25545	0.810811	7.76809																										421	54.6	10.4359			12.61			0.627724	0.444638	4.49869
	382	47.3	16.2947	16.54	0.627724	0.549259	6.59111																										422	81.1	9.93897			12.73						0.797733
	383	71.2	16.5301	16.76	0.7585	0.65388	5.0218																										423	59.3	9.28509			12			0.863121	0.601569	5.33566
	384	43.7	16.1639	16.44	0.601569	0.496949	6.48649																										423b	10.9	11.9529			12.13			0.470793	0.418483	4.76024
	385a	61.6	16.9486	17	1.20314	0.680035	10.619																										424	76.1	10.5929			13.09			0.65388	0.523104	7.61116
	385b	80	15.7454	16.28	0.549259			0.915432	0.7585																								425	18.1	13.3653			13.64			0.65388	0.549259	7.40192
	386	30.5	16.007	16.18	0.601569	0.549259	8.63121																										426	33.2	11.6129			12.71			0.70619	0.523104	7.40192
	387	36.9	16.6085	16.72	0.575414	0.313862	10.4359																										427	16.2	10.3575			10.93			0.601569	0.470793	5.38797
	388	75.5	15.0654	15.89	1.15083	0.836966	4.10636																										428	55.6	11.4821			13.31			0.65388	0.470793	5.64952
	389	74.6	15.5623	16.2	0.784656	0.444638	7.34961																										429	77	9.31125			12.57			0.732345	0.601569	2.85092
	390	62.8	15.0654	15.81	0.65388	0.444638	6.35571																										430	65.1	8.78814			12.16			0.496949	0.444638	3.55711
	391	69.1	16.1901	16.56	0.70619	0.549259	5.36181																										431	41.5	10.5929			12.3			0.65388	0.444638	8.0558
	392	69.4	15.3269	15.99	0.784656	0.496949	8.47428																										432	48	9.75588			11.97			0.810811	0.732345	3.08631
	393	85.7	16.0593	16.53	0.366173			0.810811	0.7585																								433	60.5	9.52049			12.17			1.04621	0.967742	2.5109
	394a	65.4	16.347	16.61	0.601569	0.444638	5.72799																										434	53.6	11.5867			13.34			0.863121	0.784656	2.95554
	394b	67.6	15.1439	15.85	0.680035	0.496949	8.65737																										434a	11.8	10.8021			11.1			0.444638	0.392328	7.76809
	394c	5.6	16.3731	16.41	0.392328	0.313862	9.62511																										435	58.5	8.8143			11.93			1.07236	0.915432	4.18483
	395	75.6	15.4839	16.14	0.784656	0.627724	5.98954																										435b	64.2	11.9006			13.75			0.680035	0.575414	2.85092
	396	44.7	16.0331	16.29	0.993897	0.549259	7.8204																										436	84.4	10.4359			13.05						0.523104
	397a	66.3	16.9486	17.01	1.15083	0.836966	10.8021																										437	78.2	9.3374			12.61			0.601569	0.418483	5.85876
	397b	27.9	15.6146	15.81	0.392328	0.366173	5.3095																										438	8.6	13.4176			13.49			0.418483	0.340017	5.7803
	398a	38.7	17.5763	17.52	0.967742	0.836966	6.40802																										439	17.4	12.5283			12.87			0.575414	0.444638	4.0279
	398b	3.3	16.4516	16.5	0.366173	0.261552	4.36792																										440	82.6	10.2267			12.91			0.470793	0.392328	4.96949
	399	16.7	16.7916	16.82	0.470793	0.418483	5.91107																										440b	70.7	7.37576			12.21			0.287707	0.235397	2.40628
	400	51.1	16.1901	16.48	0.889276	0.810811	8.08195																										441	15.3	13.1822			13.4			0.575414	0.523104	4.94333
	401	67.6	16.0854	16.49	0.810811	0.732345	7.63731																										442	71.1	9.49433			12.41			0.889276	0.7585	3.53095
	402	59.2	15.5362	16.05	0.7585	0.70619	5.72799																										444	79.6	9.96513			12.73			0.523104	0.340017	4.96949
	403	39.4	15.9024	16.17	0.627724	0.496949	8.39582																										445	77.9	9.93897			12.7			0.993897	0.7585	5.46643
	403a	23.1	14.3069	14.6	0.496949	0.366173	11.116																										445a	51.4	10.3575			12.47			0.601569	0.418483	6.12031
	404	59.8	15.1177	15.79	0.967742	0.680035	7.95118																										446	66.4	9.70357			12.4			0.732345	0.470793	4.21099
	405	43.5	16.687	16.82	0.967742	0.575414	10.5144																										447	62.1	9.54664			12.22			0.496949	0.418483	5.72799
	406	65.9	16.8178	16.94	0.810811	0.575414	6.59111																										449	40.4	10.8544			12.44			0.523104	0.470793	5.59721
	407	27.9	16.2162	16.33	0.496949	0.366173	5.96338																										451	73.7	9.93897			12.66			0.889276	0.70619	4.60331
	408	45	16.3731	16.6	0.601569	0.444638	7.68963																										452	75.9	9.59895			12.55			0.889276	0.65388	4.08021
	409	6.6	15.8762	15.91	0.392328	0.366173	9.31125																										453	31.4	12.9468			13.68			0.70619	0.601569	7.53269
	409a	4.6	16.0854	16.1	0.366173	0.340017	5.44028																										454	62	10.4621			12.8			0.601569	0.418483	6.22493
	410	39.1	15.3269	15.7	0.549259	0.470793	8.02964																										455	76.5	9.28509			12.55			0.70619	0.470793	5.91107
	411	70.6	16.2162	16.57	0.784656	0.549259	6.59111																										456	11.5	12.9207			13.07			0.496949	0.418483	4.21099
	412	74.9	15.7977	16.33	0.575414	0.392328	5.44028																										457	50.1	11.4037			13.12			0.967742	0.680035	7.03575
	413	57.3	16.6085	16.79	0.836966	0.523104	7.24499																										459	28	12.5283			13.23			0.575414	0.470793	8.44813
	414	38.6	16.3731	16.56	0.418483	0.313862	6.5388																										460	86.9	8.76199			12.84			0.444638			0.941587	0.810811
	415	55.1	16.7393	16.85	0.836966	0.784656	4.57716																										461	81.7	9.5728			12.72						0.7585
	416	36.7	15.0392	15.43	0.418483	0.235397	7.71578																										462	57.5	9.75588			12.24			0.836966	0.627724	3.034
	417	19.9	17.0532	17.11	0.549259	0.418483	6.74804																										464	73.1	9.31125			12.46			0.863121	0.784656	3.24324
	418	38.8	16.3993	16.56	0.470793	0.366173	8.52659																										465	26.9	8.86661			10.43			0.523104	0.444638	1.59547
	419	84	16.8701	17.02	0.340017			1.20314	1.20314																								466	26.6	12.3714			13.06			0.575414	0.444638	9.52049
	420	66.1	16.7655	16.94	0.863121	0.496949	7.61116																										467	46.6	10.7498			12.58			1.04621	0.810811	5.0218
	421	88.4	16.6609	16.9	0.313862			0.7585																									468	50.2	11.116			12.93			0.732345	0.392328	8.73583
	422	41.7	16.2685	16.5	0.680035	0.549259	8.60506																										469	46	10.7759			12.58			0.7585	0.65388	6.22493
	422a	75.9	16.6085	16.83	0.889276	0.836966	4.91718																										470	36.2	10.8806			12.29			0.627724	0.549259	6.35571
	423	57.3	17.184	17.2	0.993897	0.7585	8.23888																										471	40.1	9.59895			11.57			0.549259	0.470793	5.28335
	424	67.8	16.5562	16.82	0.967742	0.601569	9.28509																										471b	40.7	11.3514			12.8			0.65388	0.549259	2.09241
	425	27	15.667	15.88	0.575414	0.523104	7.03575																										472	84.7	8.91892			12.77						1.517	1.41238
	426	82.3	15.3531	16.09	0.366173			0.967742	0.915432																								473	67.7	9.52049			12.31			0.496949	0.444638	3.00785
	427	30.6	16.7132	16.77	0.65388	0.549259	6.25109																										474	46.2	10.0174			12.08			0.627724	0.549259	6.40802
	428	65	14.5161	15.44	1.09852	0.836966	7.2973																										475	61.5	9.23278			12.07			0.575414	0.418483	3.81866
	429	26.5	17.8901	17.83	0.784656	0.732345	6.93112																										476	26.5	11.299			12.19			0.523104	0.366173	7.14037
	430	67.2	15.8239	16.3	1.07236	0.680035	9.31125																										477	65.9	10.4359			12.85			0.601569	0.549259	2.43243
	431	31.4	18.3348	18.15	0.523104	0.496949	6.80035																										478	46.3	8.99738			11.44			0.627724	0.523104	1.77855
	432	88.3	17.5501	17.45	0.313862			1.02005	0.915432																								479	78.6	9.23278			12.61			0.7585	0.680035	1.80471
	432a	38.9	16.0331	16.25	0.496949	0.444638	8.5789																										480	34.7	12.0575			13.1			0.470793	0.418483	2.85092
	433	80.9	16.687	16.9	0.732345			1.30776																									480b	45	8.94507			11.37			0.470793	0.418483	3.74019
	433a	52.7	14.0976	15.02	0.627724	0.496949	5.59721																										481	44.8	11.299			12.89			1.17698	0.810811	5.3095
	434	67.4	16.687	16.88	1.15083	0.836966	6.59111																										482	68.3	11.3252			13.45			1.07236	0.784656	6.09416
	435	39.2	17.2624	17.28	0.784656	0.549259	7.24499																										483	37.8	11.2206			12.6			0.549259	0.444638	6.51264
	436	54	14.4377	15.25	0.915432	0.680035	4.83871																										484	75	11.0636			13.37			0.627724	0.470793	2.11857
	437a	65.5	15.667	16.22	0.836966	0.627724	6.19878																										485	32.5	12.3976			13.28			0.575414	0.496949	5.3095
	437b	67	16.8178	16.94	1.02005	0.915432	4.60331																										485b	27.9	11.6914			12.56			0.496949	0.366173	3.60942
	438a	46.8	16.6347	16.76	0.863121	0.732345	5.17873																										486	54.1	10.4098			12.58			1.09852	0.863121	4.01221
	438b	54.7	15.3531	15.95	0.915432	0.810811	4.73409																										487	7.2	12.9468			13.01			0.470793	0.444638	5.88492
	439	75.2	15.7716	16.33	0.889276	0.549259	6.12031																										488	70.6	8.52659			12.32			0.65388	0.496949	5.33566
	440	18.1	14.9608	15.14	0.470793	0.340017	7.00959																										489	63.1	10.8282			13.05			1.20314	0.941587	5.33566
	440a	31.3	16.0854	16.27	0.496949	0.366173	6.69573																										490	51.9	10.5144			12.58			0.601569	0.523104	2.66783
	440b	83.4	14.4638	15.54	0.209241			0.470793																									491	83.7	8.0558			12.69						1.02005
	441a	36	16.3731	16.55	0.523104	0.470793	4.00174																										492	58.7	10.0697			12.47			0.915432	0.65388	5.64952
	441b	73.1	16.4516	16.76	0.889276	0.732345	6.09416																										493	64.9	10.4621			12.85			1.17698	0.810811	6.85266
	441c	17.2	14.0715	14.29	0.366173	0.235397	8.84045																										494	40.4	11.2729			12.73			0.70619	0.627724	1.80471
	442	41.7	16.5824	16.74	0.810811	0.549259	7.89887																										495	78.7	10.619			13.13			0.575414	0.418483	6.69573
	443	74.8	15.9547	16.45	1.12467	0.915432	5.15257																										496	53.8	9.93897			12.26			0.627724	0.340017	7.63731
	444a	76.2	16.2424	16.58	1.02005	0.523104	10.0959																										497	75.5	10.1482			12.81			1.09852	0.941587	2.2755
	444b	68.9	16.8178	16.95	1.07236	0.863121	6.32956																										498	61.5	8.08195			11.98			0.863121	0.70619	3.29555
	445	64	15.6931	16.22	0.993897	0.863121	7.48038																										501	67.8	9.93897			12.57			1.02005	0.889276	3.7925
	446	45.1	16.3731	16.6	0.836966	0.601569	10.3051																										502	48.4	11.299			13			0.863121	0.784656	2.61552
	447	77	16.007	16.46	0.836966	0.7585	3.66173																										503	64.7	9.3374			12.19			0.549259	0.340017	5.0218
	448	41.9	16.007	16.27	0.65388	0.523104	5.3095																										503b	83	9.20663			12.74
	449	27.5	15.6408	15.8	0.470793	0.444638	3.74019																										504	50.2	9.72973			12.02			0.680035	0.601569	7.2973
	450a	50.2	14.8823	15.55	0.915432	0.549259	6.72188																										504b	66.3	10.2005			12.71			0.915432	0.65388	4.57716
	450b	15.9	17.16	17.2	0.418483	0.340017	6.5388																										504c	45.8	9.5728			11.77			0.418483	0.287707	5.72799
	451	78.9	15.7977	16.34	0.680035	0.549259	4.36792																										505	62.2	10.1744			12.62			0.65388	0.601569	1.96164
	452	33.3	15.5885	15.87	0.575414	0.549259	6.69573																										506	3.3	12.3714			12.39			0.366173	0.340017	8.55275
	453	74.7	16.6085	16.83	1.04621	0.784656	7.42807																										507	40.4	11.0898			12.6			0.549259	0.496949	3.00785
	454	65.1	15.8239	16.29	0.549259	0.470793	3.42633																										508	40.1	11.1944			12.66			0.680035	0.627724	1.88317
	455	28.3	17.1055	17.11	0.523104	0.366173	4.91718																										509	55.6	9.31125			11.91			0.967742	0.70619	3.53095
	456	29.3	15.3008	15.57	0.65388	0.549259	8.65737																										510	25.6	11.6391			12.42			0.549259	0.496949	2.24935
	457	73.3	16.5562	16.83	0.784656	0.470793	7.92502																										511	29.4	10.8021			11.94			0.496949	0.444638	1.7524
	458b	33.4	15.8762	16.12	0.549259	0.444638	6.85266																										512	52.1	10.2528			12.42			0.680035	0.627724	2.85092
	458c	33.6	16.6609	16.78	0.732345	0.523104	7.16652																										513	47.6	10.8806			12.7			0.732345	0.549259	3.68788
	458d	59.3	14.9608	15.72	0.732345	0.601569	6.87881																										514	44.9	11.2467			12.86			0.549259	0.496949	8.73583
	459	87.2	16.1116	16.53	0.627724			1.46469	1.09852																								515	32.9	11.2729			12.44			0.549259	0.313862	7.32345
	460	38.9	15.1962	15.62	0.523104	0.392328	7.71578																										516	66.7	8.99738			12.23			0.7585	0.549259	6.66957
	461	61.3	16.1901	16.53	1.07236	0.941587	7.74194																										517	17.9	13.1561			13.45			0.444638	0.366173	7.42807
	462	72.9	14.6469	15.56	0.889276	0.7585	5.38797																										518	58.9	10.9329			13.03			0.993897	0.732345	5.70183
	463	43.9	15.3793	15.84	0.784656	0.732345	4.91718																										519	30.3	11.1421			12.24			0.418483	0.366173	4.21099
	464	21.3	14.6207	14.83	0.549259	0.444638	7.08806																										520	48.9	11.2206			12.97			0.575414	0.418483	7.79425
	465	76.7	15.8762	16.39	0.732345	0.575414	6.12031																										521	48.8	11.456			13.12			0.523104	0.470793	1.64778
	466	21.4	16.3208	16.37	0.549259	0.496949	7.03575																										522	35.1	12.5283			13.47			0.65388	0.470793	4.18483
	467	59.9	15.4839	16.06	0.836966	0.784656	7.00959																										523	38	9.49433			11.41			0.523104	0.418483	6.01569
	468	23.7	17.0793	17.11	0.627724	0.366173	8.68352																										524	42.8	11.2729			12.81			0.784656	0.680035	3.94943
	469	42.3	16.5039	16.66	0.70619	0.444638	9.5728																										525	63.4	10.4359			12.81			0.65388	0.575414	2.09241
	470	85.2	16.4516	16.77	0.235397			0.863121	0.7585																								526	34.7	10.4621			11.93			0.810811	0.627724	4.18483
	470a	3.9	14.5946	14.61	0.366173	0.313862	6.32956																										527	64.8	11.5867			13.56			0.549259	0.496949	4.05405
	471	83.8	16.1901	16.59	0.470793			0.915432																									528	80.3	8.60506			12.62			0.575414			1.43854
	472	79.8	16.0331	16.46	0.627724	0.444638	8.31735																										529	41.3	10.6975			12.36			0.496949	0.444638	4.00174
	473	23.2	16.1901	16.29	0.575414	0.418483	8.3435																										530	87.7	9.97559			12.89						1.56931	1.56931
	474	71.1	16.5301	16.76	0.941587	0.784656	7.27114																										531	43.8	11.3514			12.9			0.941587	0.863121	3.7925
	475	83.3	15.0654	15.91	0.70619			1.30776	1.25545																								531b	85.4	10.4307			13.05						0.575414
	476	55.8	16.7132	16.86	0.810811	0.627724	12.2406																										532	86.3	8.5789			12.81			0.575414			1.41238
	478	39.1	17.5763	17.52	0.732345	0.496949	8.78814																										533	36.8	10.6713			12.17			0.601569	0.549259	1.85702
	479	55.5	16.6347	16.78	0.784656	0.627724	6.77419																										534	83.1	9.52049			12.75						1.43854	1.38622
	480	58.8	16.1116	16.45	0.889276	0.627724	6.25109																										534b	4.2	10.1744			10.23			0.418483	0.392328	6.80035
	481	70.1	16.4255	16.69	0.7585	0.549259	6.40802																										535	50.2	11.6391			13.28			0.680035	0.627724	2.40628
	482	64.6	17.1578	17.2	0.863121	0.523104	7.63731																										536	86.1	9.54664			12.84						1.04621	0.889276
	483	57.8	15.8239	16.25	0.575414	0.470793	6.01569																										537	33.4	11.6914			12.78			0.601569	0.523104	4.81255
	484	55	17.4194	17.34	0.993897	0.65388	6.90497																										538	12.9	12.816			13			0.470793	0.392328	4.34176
	485	61.9	15.0915	15.81	0.889276	0.784656	4.13252																										540	42.7	10.8806			12.54			0.601569	0.444638	8.02964
	486	83.2	16.5824	16.84	0.496949			0.863121	0.7585																								541	36.7	12.8422			13.76			1.02005	0.732345	7.27114
	487	55.7	17.1055	17.13	0.680035	0.496949	11.3514																										542	28.9	12.2668			13.05			0.496949	0.340017	8.55275
	488	51.8	15.9024	16.27	0.810811	0.680035	4.10636																										543	44.8	7.8204			11.27			0.496949	0.418483	1.98779
	489	18.2	16.2685	16.36	0.575414	0.418483	3.45248																										544	73.4	10.1482			12.78			0.993897	0.784656	2.53705
	490	45.2	16.9747	17.05	0.70619	0.444638	5.04795																										545	56.6	10.8806			12.94			0.575414	0.470793	2.74629
	491	43.1	16.347	16.51	0.967742	0.836966	3.84481																										546	70.8	10.3575			12.88			0.941587	0.836966	2.5109
	492a	55	16.8178	16.92	0.784656	0.549259	7.84656																										547	35	11.8483			12.95			0.680035	0.627724	1.33391
	492b	66.3	14.5161	15.45	0.784656	0.65388	4.94333																										548	53.8	10.4621			12.6			0.7585	0.601569	4.23714
	493	12.8	16.8178	16.81	0.549259	0.392328	8.08195																										548b	61.8	8.39582			12.02			0.627724	0.575414	0.967742
	494	44.8	15.8762	16.22	0.549259	0.470793	7.89887																										549	79.6	9.65126			12.66			1.02005	0.889276	6.22493
	495	71.2	15.4577	16.12	0.784656	0.680035	4.2633																										550	44.3	11.116			12.75			0.601569	0.549259	3.68788
	496	65.2	13.6007	14.86	0.70619	0.496949	7.8204																										551	29.7	11.8483			12.76			0.470793	0.392328	4.44638
	497	53.4	16.7655	16.92	0.627724	0.523104	4.21099																										552	4	11.7437			11.77			0.392328	0.313862	4.13252
	498	36.4	16.4778	16.63	0.575414	0.549259	3.08631																										553	42.1	9.75588			11.75			0.627724	0.444638	7.03575
	499a	17.5	15.9547	16.07	0.601569	0.575414	2.2755																										554	28.4	11.456			12.4			0.601569	0.523104	5.25719
	499b	75.9	15.6931	16.27	0.836966	0.496949	7.76809																										554b	83.7	11.0636			13.43
	499c	86.9	16.0593	16.53	0.261552			1.09852	1.02005																								555	54.7	10.8806			12.9			0.70619	0.496949	3.94943
	500	47.4	15.0654	15.66	0.889276	0.680035	4.15867																										556	51.9	10.8806			12.82			0.967742	0.784656	6.12031
	501	87.8	16.8439	16.96	0.444638			1.15083	1.09852																								557	53.7	9.83435			12.19			0.549259	0.496949	0.836966
	502	32.9	16.5824	16.7	0.496949	0.470793	6.85266																										557b	37.5	11.4037			12.72			0.680035	0.444638	6.19878
	503	72.3	16.8178	16.95	0.889276	0.810811	6.64342																										558	44.7	10.7759			12.53			0.70619	0.601569	5.72799
	504	12.1	16.7655	16.81	0.392328	0.340017	10.8282																										558b	27.9	12.5283			13.23			0.575414	0.366173	3.94943
	505	79	16.3208	16.65	1.04621	0.70619	8.63121																										559	34.7	12.2406			13.24			0.496949	0.444638	2.2755
	506	32.2	17.7071	17.63	0.549259	0.523104	14.2546																										560	3.3	11.6391			11.66			0.392328	0.366173	4.34176
	507a	61.5	17.7594	17.61	0.915432	0.784656	5.57105																										561	42	10.2005			12.05			0.7585	0.65388	3.63557
	507b	23.4	15.6146	15.76	0.601569	0.444638	9.52049																										562	85.3	8.47428			12.77						0.496949
	508	51.2	14.8561	15.56	0.836966	0.784656	2.69398																										563	29.9	12.2929			13.11			0.470793	0.366173	6.66957
	509	39.5	16.8963	16.96	0.7585	0.340017	8.55275																										564	52.6	9.62511			12.03			0.810811	0.70619	1.62162
																																	565	11.5	12.476			12.64			0.496949	0.444638	5.04795
																																	567	86.4	7.37576			12.73						0.915432	0.836966
																																	568	37.8	10.8021			12.3			0.732345	0.523104	5.5449
																																	569	73.3	8.55275			12.41			0.523104	0.470793	5.04795
																																	573	48.2	10.3051			12.33			0.523104	0.444638	2.30166
																																	574	23.2	10.5929			11.49			0.470793	0.392328	7.50654
																																	575	40.7	8.73583			11.13			0.549259	0.366173	6.068
																																	577	32	10.1744			11.61			0.418483	0.340017	4.34176
																																	578	19.1	13.4176			13.72			0.601569	0.444638	2.01395
																																	579	39.2	10.9329			12.45			0.65388	0.444638	2.69398
																																	579b	75.1	9.23278			12.51			0.680035	0.444638	4.13252
																																	581	35	11.5867			12.76			0.549259	0.470793	6.32956
																																	582	19.2	12.8945			13.25			0.627724	0.549259	1.36007
																																	583	55.9	9.8082			12.24			0.836966	0.784656	2.79861
																																	583b	43.6	10.4621			12.28			0.523104	0.444638	2.40628
																																	584	81	9.96513			12.74						0.496949
																																	585	30.5	12.633			13.4			0.65388	0.549259	3.45248
																																	585a	29.5	12.6068			13.35			0.7585	0.627724	5.20488
																																	586	50.7	11.0113			12.88			0.680035	0.470793	6.74804
																																	587	59.4	11.6391			13.5			0.627724	0.496949	6.09416
																																	588	7.7	11.6652			11.77			0.470793	0.366173	6.59111
																																	589	80.7	8.16042			12.6						0.810811	0.680035
																																	590	54.8	10.3836			12.58			0.863121	0.70619	2.48474
																																	591	36	11.7698			12.93			0.496949	0.418483	6.25109
																																	591b	40.1	10.3313			12.06			0.496949	0.418483	1.72624
																																	592	33.9	11.5083			12.66			0.601569	0.523104	3.19093
																																	592b	1.9	12.1622			12.17			0.392328	0.340017	5.5449
																																	594	12.8	10.9067			11.24			0.496949	0.392328	4.57716
																																	595	49.4	10.6975			12.63			0.836966	0.732345	3.45248
																																	596	59.1	10.6713			12.87			0.784656	0.444638	8.18657
																																	597	67.8	9.38971			12.3			1.04621	0.967742	1.93548
																																	598	41.6	10.0959			11.96			0.993897	0.810811	6.32956
																																	599	5.9	13.7576			13.79			0.444638	0.418483	4.49869
																																	600	59.6	10.2005			12.58			0.836966	0.70619	4.65562
																																	600b	13.7	12.5806			12.8			0.523104	0.470793	3.00785
																																	601	41.7	11.8221			13.16			0.523104	0.418483	2.95554
																																	602	59.2	11.1944			13.21			0.65388	0.470793	7.27114
																																	604	35.3	11.5083			12.71			0.575414	0.470793	7.71578
																																	605	39.3	11.1421			12.6			0.70619	0.575414	2.45859
																																	606	59.5	10.1404			12.54			0.732345	0.70619	4.89102
																																	607	67.1	10.2267			12.74			0.993897	0.810811	4.76024
																																	608	36.3	11.3252			12.62			0.7585	0.575414	6.74804
																																	610	1.8	12.973			12.98			0.392328	0.366173	1.59547
																																	611	32.5	10.8282			12.1			0.523104	0.444638	1.98779
																																	612	28.9	11.6652			12.58			0.523104	0.470793	4.94333
																																	612b	35.5	12.0837			13.15			0.549259	0.313862	9.5728
																																	613	31.6	11.456			12.53			0.444638	0.313862	3.11247
																																	614	57	10.959			13			0.784656	0.65388	4.10636
																																	616	59.6	10.8806			13.01			0.915432	0.732345	7.84656
																																	617	27.4	12.2929			13.02			0.496949	0.470793	2.09241
																																	618	32	12.7899			13.57			0.392328	0.366173	1.17698
																																	619	7.8	13.2868			13.35			0.470793	0.444638	3.19093
																																	620	51.7	10.9329			12.85			0.680035	0.601569	1.12467
																																	621	74.4	10.0436			12.73			0.836966	0.810811	1.64778
																																	622	24.1	12.7637			13.3			0.366173	0.287707	1.04621
																																	623	70.3	10.6713			13.07			1.12467	0.863121	4.86486
																																	624	63.8	11.1683			13.28			0.784656	0.65388	7.19268
																																	625	79.7	10.5405			13.09			0.784656	0.680035	7.05929
																																	626	73.3	8.84045			12.43			0.915432	0.601569	3.53095
																																	627	40.6	9.23278			11.35			0.65388	0.470793	5.51874
																																	628	55.5	8.86661			11.82			0.889276	0.784656	1.88317
																																	629	35.8	12.3714			13.37			0.549259	0.470793	4.39407
																																	630	8.9	13.5222			13.59			0.496949	0.444638	7.08806
																																	631	55.7	10.8021			12.87			0.575414	0.444638	6.59111
																																	632	79.5	9.8082			12.67			0.65388	0.601569	1.54316
																																	633	49.5	10.0174			12.19			0.549259	0.470793	2.45859
																																	633b	9	12.7376			12.83			0.496949	0.366173	9.8082
																																	635	82.1	8.63121			12.68						1.02005
																																	636	58.1	9.86051			12.33			0.7585	0.680035	1.22929
																																	637	3.9	13.1822			13.2			0.392328	0.366173	1.85702
																																	638	85.4	10.3051			12.97			0.523104			0.993897
																																	639	86.9	7.97733			12.8						0.889276
																																	640	77.2	7.97733			12.48			0.7585	0.601569	3.08631
																																	641b	49.1	11.6914			13.29			0.70619	0.575414	6.74804
																																	642	66.8	9.31125			12.26			0.601569	0.549259	1.83086
																																	643	41.7	11.6391			13.03			0.680035	0.65388	2.53705
																																	644	84.5	10.0436			12.81						1.09852	1.02005
																																	646	81.3	10.6713			13.18
																																	647	49.9	10.279			12.37			0.627724	0.496949	5.12642
																																	648	86.6	9.59111			12.85						1.09852	1.09852
																																	649	30.7	11.9791			12.89			0.470793	0.418483	1.80471
																																	650	60.6	9.72973			12.3			0.732345	0.70619	1.83086
																																	650b	87.6	10.7367			13.24						0.941587	0.7585
																																	651	41.1	11.2206			12.72			0.575414	0.470793	3.58326
																																	653	13.7	12.0314			12.29			0.418483	0.366173	1.36007
																																	654	5.6	11.2206			11.29			0.366173	0.340017	6.32956
																																	654b	52.6	10.2005			12.4			0.549259	0.470793	1.46469
																																	655	33.4	11.1421			12.37			0.601569	0.549259	3.60942
																																	656	31.4	12.0314			12.96			0.523104	0.496949	2.43243
																																	657	75.4	9.38971			12.53			1.33391	0.889276	4.99564
																																	658	55.4	9.99128			12.34			0.732345	0.523104	4.15867
																																	661	46.3	9.3374			11.64			0.7585	0.627724	7.21622
																																	662	57.5	10.0697			12.44			0.889276	0.70619	3.63557
																																	664	18.3	11.9268			12.37			0.549259	0.496949	2.58936
																																	664b	84.4	9.10201			12.77						0.65388
																																	665	57.7	9.93897			12.37			0.549259	0.418483	6.09416
																																	666	43	10.6452			12.39			0.784656	0.680035	7.77594
																																	667	25.8	12.2406			12.92			0.470793	0.392328	1.17698
																																	668	28.2	10.8021			11.89			0.444638	0.418483	4.23714
																																	669	53.7	9.38971			11.91			0.732345	0.680035	2.06626
																																	670	74.5	10.5929			13.07			0.967742	0.889276	1.7524
																																	671	13.8	13.1561			13.34			0.470793	0.418483	7.40192
																																	672	76.5	10.1482			12.82			0.680035	0.601569	1.88317
																																	673	44	10.6713			12.44			0.70619	0.575414	4.551
																																	674	85.7	9.96513			12.84						0.915432	0.889276
																																	676	60.7	10.1482			12.57			0.575414	0.444638	4.83871
																																	677	86.5	9.02354			12.83
																																	678	77.7	9.02354			12.57			0.680035	0.601569	2.09241
																																	679	46	10.3836			12.31			0.863121	0.732345	3.81866
																																	680	47.5	8.42197			11.45			0.627724	0.575414	1.67393
																																	681	7.1	12.7637			12.83			0.444638	0.313862	8.31735
																																	682	13.5	12.1883			12.43			0.523104	0.496949	2.90323
																																	683	55.6	10.4882			12.67			0.65388	0.549259	5.83261
																																	684	64	10.7498			13.02			0.889276	0.575414	6.59111
																																	685	44.3	12.0314			13.39			0.70619	0.627724	2.22319
																																	686	83.8	10.3313			12.98						1.12467	0.863121
																																	686b	49	11.1421			12.92			0.889276	0.732345	3.55711
																																	687	76.8	9.23278			12.56			0.889276	0.810811	7.20575
																																	688	37	11.796			12.99			0.680035	0.523104	3.19093
																																	689	86.2	10.2005			12.91						0.680035
																																	690	82.5	8.86661			12.7						0.915432
																																	691	56.4	11.1683			13.13			0.680035	0.549259	6.35571
																																	692	31.5	10.7759			12.02			0.549259	0.444638	5.41412
																																	693	67.8	10.2267			12.75			0.784656	0.732345	1.7524
																																	694	30	12.6591			13.41			0.65388	0.549259	6.69573
																																	695	84.3	10.5929			13.15						1.12467
																																	696	48.2	9.18047			11.6			0.496949	0.418483	4.36792
																																	697	47.9	10.0174			12.13			0.889276	0.784656	3.34786
																																	698	50.5	10.5405			12.56			0.523104	0.418483	6.09416
																																	699	40.7	11.796			13.11			0.575414	0.523104	5.85876
																																	700	70.6	9.65126			12.44			0.627724	0.549259	2.45859
																																	701	38.2	11.9529			13.14			0.575414	0.418483	4.42023
																																	702	57.6	9.46818			12.07			0.941587	0.680035	5.0218
																																	703	55.6	9.02354			11.84			0.915432	0.70619	4.39407
																																	704	28.1	10.959			12			0.470793	0.444638	2.38012
																																	705	63.2	9.93897			12.49			0.65388	0.549259	3.55711
																																	706	57.8	9.62511			12.17			0.732345	0.575414	5.59721
																																	707	54.1	10.4359			12.59			0.863121	0.836966	2.85092
																																	709	41.7	11.1944			12.72			0.601569	0.523104	0.941587
																																	711	81.7	8.38797			12.65						0.889276
																																	713	86.4	9.99128			12.85						0.575414
																																	714	69.1	10.5405			12.97			0.470793	0.392328	1.98779
																																	715	74.9	10.5929			13.08			0.680035	0.470793	5.28335
																																	716	32.8	11.8745			12.89			0.889276	0.627724	6.14647
																																	717	63.1	9.93897			12.49			0.889276	0.70619	2.87707
																																	718	5.5	12.6853			12.72			0.418483	0.392328	2.56321
																																	718b	50.4	12.2145			13.68			0.65388	0.601569	1.54316
																																	719	35.2	12.0052			13.08			0.810811	0.523104	8.3435
																																	720	27.3	12.8684			13.49			0.523104	0.496949	2.24935
																																	721	46.7	10.1744			12.2			0.784656	0.627724	4.31561
																																	722	85.6	10.8282			13.29						1.22929
																																	723	55.6	10.959			12.97			0.70619	0.65388	4.0279
																																	725	61.6	10.9852			13.12			0.627724	0.523104	8.68352
																																	726	15.3	12.4499			12.73			0.444638	0.392328	6.01569
																																	727	46.6	11.4821			13.08			0.7585	0.601569	8.39582
																																	728	63.2	10.5144			12.85			0.810811	0.627724	7.74194
																																	729	28.3	13.3391			13.9			0.444638	0.392328	4.0279
																																	730	55.6	10.2005			12.48			1.12467	1.02005	5.23104
																																	730b	34.1	11.0113			12.3			0.732345	0.627724	8.50044
																																	732	42.9	9.59895			11.68			0.627724	0.549259	6.09416
																																	733	51.5	10.4621			12.54			0.418483	0.287707	5.33566
																																	734	63.9	10.5667			12.9			0.810811	0.70619	3.7925
																																	735	89.5	10.4359			13.06						0.800349	0.761116
																																	736	57	10.9852			13.02			0.70619	0.601569	2.17088
																																	737	78.8	9.18047			12.61			0.601569	0.392328	5.98954
																																	738	29.3	12.476			13.24			0.523104	0.470793	2.2755
																																	739	36.4	11.7175			12.91			0.523104	0.444638	4.99564
																																	741	48.2	11.0375			12.82			0.7585	0.627724	4.10636
																																	743	40.2	10.5144			12.19			0.496949	0.444638	2.38012
																																	744	79.8	9.20663			12.64			0.313862	0.261552	3.42633
																																	745	39.1	11.9268			13.15			0.601569	0.523104	1.72624
																																	746	32.3	10.7236			12.02			0.470793	0.313862	6.69573
																																	747	39.9	10.3575			12.07			0.523104	0.444638	2.43243
																																	748	79.5	10.6975			13.18			0.967742	0.680035	4.10636
																																	749	50.3	11.9529			13.5			1.20314	0.915432	4.551
																																	750	59.4	9.3374			12.03			0.836966	0.70619	2.95554
																																	751	32	13.1037			13.82			0.470793	0.418483	4.36792
																																	752	89.4	9.12816			12.93						1.20314	1.04621
																																	753	19	11.5606			12.08			0.549259	0.470793	2.38012
																																	754	57.1	9.91282			12.33			0.627724	0.418483	3.92328
																																	755	25.1	11.1944			12.05			0.549259	0.496949	2.45859
																																	757	77.9	11.2206			13.49			0.627724	0.418483	2.72014
																																	759	67	10.8806			13.15			1.09852	0.810811	7.19268
																																	760	45.1	10.7236			12.51			0.496949	0.444638	3.08631
																																	762	42.6	12.2145			13.47			0.444638	0.392328	5.44028
																																	763	40.2	11.7437			13.06			0.810811	0.70619	2.48474
																																	766	44.3	10.9329			12.63			0.444638	0.418483	2.38012
[truncated: 12 more columns]
